# Supplementary material for: Risk and Status of Gastrointestinal Cancer According to the International Standard Industrial Classification in Korean Workers
Source: MDPI journal article supplement (doi:10.3390/cancers14205164), 2022-10-21
Supplement: s1 [file s1]

**Supplementary Table S1.** Age-standardized incidence ratio (SIR) and 95% confidence interval (CI) of all gastrointestinal tract cancer according to divisions of the Korean Standard Industrial Classification (KSIC).

| KSIC      |                                                                                                | Total workers  |                |                  | Male workers   |                |                  | Female workers |                |                   |
|-----------|------------------------------------------------------------------------------------------------|----------------|----------------|------------------|----------------|----------------|------------------|----------------|----------------|-------------------|
| Divisions | Description                                                                                    | Expected cases | Observed cases | SIR (95% CI)     | Expected cases | Observed cases | SIR (95% CI)     | Expected cases | Observed cases | SIR (95% CI)      |
| 01        | Agriculture                                                                                    | 172.25         | 158            | 0.92 (0.79-1.07) | 145.41         | 134            | 0.92 (0.77-1.09) | 25.26          | 24             | 1.41 (0.61-1.41)  |
| 02        | Forestry                                                                                       | 40.51          | 62             | 1.53 (1.13-2.14) | 41.64          | 59             | 1.42 (1.08-1.83) | 2.95           | 3              | 1.02 (0.21-2.97)  |
| 03        | Fishing and aquaculture                                                                        | 113.83         | 136            | 1.19 (0.99-1.45) | 99.44          | 120            | 1.21 (1.00-1.44) | 16.56          | 16             | 0.97 (0.55-1.57)  |
| 05        | Mining of coal, crude petroleum and natural gas                                                | 162.14         | 221            | 1.36 (1.17-1.60) | 169.54         | 203            | 1.20 (1.04-1.37) | 10.39          | 18             | 1.73 (1.03-2.74)  |
| 06        | Mining of metal ores                                                                           | 14.27          | 16             | 1.12 (0.67-2.04) | 14.72          | 16             | 1.09 (0.62-1.77) | 0.97           | 0              | 0.00 (0.00-3.79)  |
| 07        | Mining of non-metallic minerals, except fuel                                                   | 56.22          | 70             | 1.25 (0.96-1.65) | 59.82          | 66             | 1.10 (0.85-1.40) | 3.08           | 4              | 1.30 (0.35-3.33)  |
| 08        | Mining support service activities                                                              | 15.70          | 15             | 0.96 (0.59-1.68) | 15.44          | 13             | 0.84 (0.45-1.44) | 1.41           | 2              | 1.42 (0.17-5.12)  |
| 10        | Manufacture of food products                                                                   | 1,208.52       | 1,044          | 0.86 (0.82-0.91) | 697.45         | 710            | 1.02 (0.94-1.10) | 317.77         | 334            | 1.05 (0.94-1.17)  |
| 11        | Manufacture of beverages                                                                       | 51.49          | 46             | 0.89 (0.68-1.20) | 46.33          | 43             | 0.93 (0.67-1.25) | 6.39           | 3              | 0.47 (0.10-1.37)  |
| 12        | Manufacture of tobacco products                                                                | 3.78           | 3              | 0.79 (0.30-3.06) | 3.43           | 2              | 0.58 (0.07-2.11) | 0.45           | 1              | 2.24 (0.06-12.48) |
| 13        | Manufacture of textiles, except apparel                                                        | 1,095.48       | 979            | 0.89 (0.84-0.95) | 801.73         | 748            | 0.93 (0.93-0.87) | 222.26         | 231            | 1.04 (0.91-1.18)  |
| 14        | Manufacture of wearing apparel, clothing accessories and fur articles                          | 296.02         | 212            | 0.72 (0.64-0.81) | 158.89         | 139            | 0.87 (0.74-1.03) | 86.74          | 73             | 0.84 (0.66-1.06)  |
| 15        | Manufacture of leather, luggage and footwear                                                   | 202.10         | 197            | 0.97 (0.85-1.12) | 144.53         | 149            | 1.03 (0.87-1.21) | 41.82          | 48             | 1.15 (0.85-1.52)  |
| 16        | Manufacture of wood and of products of wood and cork; except furniture                         | 306.67         | 348            | 1.13 (1.01-1.27) | 288.42         | 317            | 1.10 (0.98-1.23) | 32.93          | 31             | 0.94 (0.64-1.34)  |
| 17        | Manufacture of pulp, paper and paper products                                                  | 330.67         | 401            | 1.21 (1.09-1.35) | 312.96         | 355            | 1.13 (1.02-1.26) | 34.78          | 46             | 1.21 (1.10-1.34)  |
| 18        | Printing and reproduction of recorded media                                                    | 702.22         | 661            | 0.94 (0.87-1.01) | 597.32         | 548            | 0.92 (0.84-1.00) | 115.81         | 113            | 0.98 (0.80-1.17)  |
| 19        | Manufacture of coke, briquettes and refined petroleum products                                 | 83.17          | 95             | 1.14 (0.92-1.43) | 92.80          | 92             | 0.99 (0.80-1.22) | 2.66           | 3              | 1.13 (0.23-3.29)  |
| 20        | Manufacture of chemicals and chemical products; except pharmaceuticals and medicinal chemicals | 1,138.21       | 1,141          | 1.00 (0.95-1.06) | 1,070.76       | 1,002          | 0.94 (0.88-1.00) | 125.27         | 139            | 1.11 (0.93-1.31)  |
| 21        | Manufacture of pharmaceuticals, medicinal chemical and botanical products                      | 80.71          | 65             | 0.81 (0.65-1.01) | 66.58          | 50             | 0.75 (0.56-0.99) | 13.65          | 15             | 1.10 (0.62-1.81)  |
| 22        | Manufacture of rubber and plastics products                                                    | 433.38         | 445            | 1.03 (0.93-1.13) | 374.08         | 372            | 0.99 (0.90-1.10) | 61.97          | 73             | 1.18 (0.92-1.48)  |
| 23        | Manufacture of other non-metallic mineral products                                             | 496.77         | 532            | 1.07 (0.98-1.17) | 488.16         | 479            | 0.98 (0.90-1.07) | 44.12          | 53             | 1.20 (0.90-1.57)  |
| 24        | Manufacture of basic metals                                                                    | 1,151.51       | 1,331          | 1.16 (1.09-1.23) | 1,201.55       | 1,253          | 1.04 (0.99-1.10) | 72.57          | 78             | 1.07 (0.85-1.34)  |
| 25        | Manufacture of fabricated metal products, except machinery and furniture                       | 1,061.23       | 1,148          | 1.08 (1.02-1.15) | 1,024.27       | 1,050          | 1.03 (0.96-1.09) | 103.64         | 98             | 0.95 (0.77-1.15)  |
| 26        | Manufacture of electronic components, computer; visual, sounding and communication equipment   | 1,433.00       | 1,258          | 0.88 (0.83-0.93) | 1,107.68       | 981            | 0.89 (0.83-0.94) | 283.42         | 277            | 0.98 (0.87-1.10)  |

|    |                                                                                                          |          |       |                  |          |       |                  |        |     |                  |
|----|----------------------------------------------------------------------------------------------------------|----------|-------|------------------|----------|-------|------------------|--------|-----|------------------|
| 27 | Manufacture of medical, precision and optical instruments, watches and clocks                            | 152.41   | 147   | 0.96 (0.82-1.14) | 123.63   | 117   | 0.95 (0.78-1.13) | 26.60  | 30  | 1.13 (0.76-1.61) |
| 28 | Manufacture of electrical equipment                                                                      | 646.57   | 643   | 0.99 (0.92-1.08) | 581.72   | 565   | 0.96 (0.88-1.04) | 81.54  | 78  | 0.96 (0.76-1.19) |
| 29 | Manufacture of other machinery and equipment                                                             | 1,440.82 | 1,524 | 1.06 (1.00-1.11) | 1,416.29 | 1,403 | 0.99 (0.94-1.04) | 131.28 | 121 | 0.92 (0.76-1.10) |
| 30 | Manufacture of motor vehicles, trailers and semitrailers                                                 | 2,148.71 | 2,068 | 0.96 (0.92-1.00) | 2,036.74 | 1,840 | 0.90 (0.86-0.95) | 222.15 | 228 | 1.03 (0.90-1.17) |
| 31 | Manufacture of other transport equipment                                                                 | 1,154.34 | 1,297 | 1.12 (1.06-1.19) | 1,238.86 | 1,233 | 1.00 (0.94-1.05) | 57.72  | 64  | 1.11 (0.85-1.42) |
| 32 | Manufacture of furniture                                                                                 | 219.32   | 210   | 0.96 (0.84-1.10) | 196.62   | 185   | 0.94 (0.81-1.09) | 27.81  | 25  | 0.90 (0.58-1.33) |
| 33 | Other manufacturing                                                                                      | 7,414.74 | 7,489 | 1.01 (0.99-1.03) | 6,612.11 | 6,554 | 0.99 (0.97-1.02) | 975.73 | 935 | 0.96 (0.90-1.02) |
| 35 | Electricity, gas, steam and air conditioning supply                                                      | 749.40   | 845   | 1.13 (1.05-1.21) | 822.45   | 819   | 0.99 (0.93-1.07) | 31.81  | 26  | 0.82 (0.53-1.20) |
| 36 | Water supply                                                                                             | 49.86    | 47    | 0.94 (0.71-1.27) | 54.06    | 45    | 0.83 (0.61-1.11) | 2.49   | 2   | 0.80 (0.10-2.90) |
| 37 | Sewage, wastewater, human and animal waste treatment services                                            | 41.55    | 42    | 1.01 (0.75-1.41) | 36.19    | 38    | 1.05 (0.74-1.44) | 5.45   | 4   | 0.73 (0.20-1.88) |
| 38 | Waste collection, treatment and disposal activities; materials recovery                                  | 230.23   | 280   | 1.22 (1.07-1.39) | 221.12   | 259   | 1.17 (1.03-1.32) | 22.28  | 21  | 0.94 (0.58-1.44) |
| 41 | General construction                                                                                     | 4,085.77 | 4,584 | 1.12 (1.09-1.16) | 4,271.98 | 4,295 | 1.01 (0.98-1.04) | 259.81 | 289 | 1.11 (0.99-1.25) |
| 42 | Specialized construction activities                                                                      | 2,501.23 | 2,979 | 1.19 (1.15-1.24) | 2,593.38 | 2,777 | 1.07 (1.03-1.11) | 172.80 | 202 | 1.17 (1.01-1.34) |
| 45 | Sale of motor vehicles and parts                                                                         | 306.82   | 361   | 1.18 (1.05-1.32) | 301.16   | 324   | 1.08 (0.96-1.20) | 28.44  | 37  | 1.30 (0.92-1.79) |
| 46 | Wholesale trade on own account or on a fee or contract basis                                             | 3,928.74 | 3,807 | 0.97 (0.94-1.00) | 3,273.32 | 3,202 | 0.98 (0.94-1.01) | 645.65 | 605 | 0.94 (0.86-1.01) |
| 47 | Retail trade, except motor vehicles and motorcycles                                                      | 3,905.78 | 3,757 | 0.96 (0.93-0.99) | 3,039.89 | 3,010 | 0.99 (0.96-1.03) | 750.49 | 747 | 1.00 (0.93-1.07) |
| 49 | Land transport and transport via pipelines                                                               | 1,193.50 | 1,468 | 1.23 (1.16-1.30) | 1,310.29 | 1,412 | 1.08 (1.02-1.14) | 50.38  | 56  | 1.11 (0.84-1.44) |
| 50 | Water transport                                                                                          | 352.05   | 444   | 1.26 (1.14-1.40) | 398.25   | 439   | 1.10 (1.00-1.21) | 10.05  | 5   | 0.50 (0.16-1.16) |
| 51 | Air transport                                                                                            | 42.80    | 56    | 1.31 (0.97-1.81) | 44.49    | 52    | 1.17 (0.87-1.53) | 3.23   | 4   | 1.24 (0.34-3.17) |
| 52 | Warehousing and support activities for transportation                                                    | 4,630.21 | 5,907 | 1.28 (1.24-1.31) | 5,182.83 | 5,771 | 1.11 (1.08-1.14) | 155.72 | 136 | 0.87 (0.73-1.03) |
| 55 | Accommodation                                                                                            | 446.11   | 370   | 0.83 (0.76-0.91) | 256.68   | 249   | 0.97 (0.85-1.10) | 116.30 | 121 | 1.04 (0.86-1.24) |
| 56 | Food and beverage service activities                                                                     | 1,707.20 | 1,078 | 0.63 (0.60-0.66) | 554.83   | 492   | 0.89 (0.81-0.97) | 629.24 | 586 | 0.93 (0.86-1.01) |
| 59 | Motion picture, video and television program production, sound recording and music publishing activities | 55.38    | 44    | 0.79 (0.61-1.05) | 52.46    | 39    | 0.74 (0.53-1.02) | 6.87   | 5   | 0.73 (0.24-1.70) |
| 60 | Broadcasting activities                                                                                  | 41.48    | 42    | 1.01 (0.75-1.41) | 26.29    | 22    | 0.84 (0.52-1.27) | 12.12  | 20  | 1.65 (1.01-2.55) |
| 61 | Postal activities and telecommunications                                                                 | 555.79   | 554   | 1.00 (0.92-1.09) | 578.07   | 513   | 0.89 (0.81-0.97) | 40.70  | 41  | 1.01 (0.72-1.37) |
| 62 | Computer programming, consultancy and related activities                                                 | 322.52   | 314   | 0.97 (0.87-1.09) | 301.87   | 273   | 0.90 (0.80-1.02) | 42.23  | 41  | 0.97 (0.70-1.32) |
| 63 | Information service activities                                                                           | 483.77   | 474   | 0.98 (0.90-1.07) | 443.80   | 419   | 0.94 (0.86-1.04) | 67.06  | 55  | 0.82 (0.62-1.07) |
| 64 | Financial service activities, except insurance and pension funding                                       | 2,054.73 | 2,070 | 1.01 (0.96-1.05) | 1,910.52 | 1,761 | 0.92 (0.88-0.97) | 298.52 | 309 | 1.04 (0.92-1.16) |

|    |                                                                                            |           |        |                  |           |        |                  |          |       |                  |
|----|--------------------------------------------------------------------------------------------|-----------|--------|------------------|-----------|--------|------------------|----------|-------|------------------|
| 65 | Insurance and pension funding                                                              | 257.91    | 250    | 0.97 (0.86-1.10) | 241.47    | 196    | 0.81 (0.70-0.93) | 38.13    | 54    | 1.42 (1.06-1.85) |
| 66 | Activities auxiliary to financial service and insurance activities                         | 118.04    | 96     | 0.81 (0.68-0.98) | 102.07    | 81     | 0.79 (0.63-0.99) | 20.16    | 15    | 0.74 (0.42-1.23) |
| 68 | Real estate activities                                                                     | 5,248.73  | 5,337  | 1.02 (0.99-1.04) | 4,439.61  | 4,590  | 1.03 (1.00-1.06) | 745.64   | 747   | 1.00 (0.93-1.08) |
| 70 | Research and development                                                                   | 46.25     | 44     | 0.95 (0.71-1.30) | 42.86     | 40     | 0.93 (0.67-1.27) | 6.36     | 4     | 0.63 (0.17-1.61) |
| 71 | Professional services                                                                      | 1,111.35  | 1,020  | 0.92 (0.87-0.97) | 923.34    | 846    | 0.92 (0.86-0.98) | 207.71   | 174   | 0.84 (0.72-0.97) |
| 72 | Architectural, engineering and other scientific technical services                         | 988.12    | 1,068  | 1.08 (1.02-1.15) | 1,020.56  | 1,001  | 0.98 (0.92-1.04) | 71.91    | 67    | 0.93 (0.72-1.18) |
| 73 | Other professional, scientific and technical services                                      | 117.04    | 123    | 1.05 (0.88-1.27) | 98.62     | 100    | 1.01 (0.83-1.23) | 19.60    | 23    | 1.17 (0.74-1.76) |
| 74 | Business facilities management and landscape services                                      | 1,598.18  | 1,479  | 0.93 (0.88-0.97) | 1,014.79  | 1,114  | 1.10 (1.04-1.17) | 353.07   | 363   | 1.03 (0.93-1.14) |
| 75 | Business support services                                                                  | 3,815.57  | 3,713  | 0.97 (0.94-1.00) | 2,742.75  | 2,883  | 1.05 (1.01-1.09) | 783.29   | 830   | 1.06 (0.99-1.13) |
| 76 | Rental and leasing activities; except real estate                                          | 172.32    | 189    | 1.10 (0.94-1.28) | 165.96    | 171    | 1.03 (0.88-1.20) | 18.10    | 18    | 0.99 (0.59-1.57) |
| 84 | Public administration and defence; compulsory social security                              | 700.04    | 749    | 1.07 (0.99-1.15) | 590.55    | 646    | 1.09 (1.01-1.18) | 111.35   | 103   | 0.93 (0.76-1.12) |
| 85 | Education                                                                                  | 2,328.99  | 1,652  | 0.71 (0.68-0.74) | 752.48    | 686    | 0.91 (0.84-0.98) | 995.91   | 966   | 0.97 (0.91-1.03) |
| 86 | Human health activities                                                                    | 2,562.50  | 2,070  | 0.81 (0.78-0.84) | 1,332.87  | 1,231  | 0.92 (0.87-0.98) | 839.21   | 839   | 1.00 (0.93-1.07) |
| 87 | Social work activities                                                                     | 1,798.76  | 1,239  | 0.69 (0.66-0.72) | 541.02    | 534    | 0.99 (0.91-1.07) | 719.16   | 705   | 0.98 (0.91-1.06) |
| 90 | Creative, arts and recreation related services                                             | 73.63     | 67     | 0.91 (0.72-1.16) | 53.88     | 53     | 0.98 (0.74-1.29) | 16.02    | 14    | 0.87 (0.48-1.47) |
| 91 | Sports activities and amusement activities                                                 | 1,085.88  | 1,132  | 1.04 (0.98-1.11) | 827.84    | 898    | 1.08 (1.01-1.16) | 198.25   | 234   | 1.18 (1.03-1.34) |
| 94 | Membership organizations                                                                   | 2,037.21  | 1,861  | 0.91 (0.87-0.95) | 1,580.42  | 1,495  | 0.95 (0.90-1.00) | 369.76   | 366   | 0.99 (0.89-1.10) |
| 95 | Maintenance and repair services of personal and household goods                            | 447.86    | 498    | 1.11 (1.01-1.22) | 450.75    | 463    | 1.03 (0.94-1.13) | 38.16    | 35    | 0.92 (0.64-1.28) |
| 96 | Other personal services activities                                                         | 1,739.66  | 1,697  | 0.98 (0.93-1.02) | 1,242.99  | 1,349  | 1.09 (1.03-1.14) | 364.74   | 348   | 0.95 (0.86-1.06) |
| 98 | Undifferentiated goods-and services-producing activities of private households for own use | 588.06    | 628    | 1.07 (0.98-1.16) | 507.31    | 539    | 1.06 (0.97-1.16) | 80.72    | 89    | 1.10 (0.89-1.36) |
| 99 | Activities of extraterritorial organizations and bodies                                    | 191.22    | 209    | 1.09 (0.95-1.27) | 175.06    | 187    | 1.07 (0.92-1.23) | 22.44    | 22    | 0.98 (0.61-1.48) |
|    | Non-confirmed                                                                              | 13,598.26 | 13,531 | 1.00 (0.98-1.01) | 11,735.86 | 11,379 | 0.97 (0.95-0.99) | 2,122.95 | 2,152 | 1.01 (0.97-1.06) |

**Supplementary Table S2.** Age-standardized incidence ratio (SIR) and 95% confidence interval (CI) of malignant neoplasms of lip, oral cavity and pharynx according to divisions of the Korean Standard Industrial Classification (KSIC).

| KSIC      |                                                                                                | Total workers  |                |                   | Male workers   |                |                   | Female workers |                |                   |
|-----------|------------------------------------------------------------------------------------------------|----------------|----------------|-------------------|----------------|----------------|-------------------|----------------|----------------|-------------------|
| Divisions | Description                                                                                    | Expected cases | Observed cases | SIR (95% CI)      | Expected cases | Observed cases | SIR (95% CI)      | Expected cases | Observed cases | SIR (95% CI)      |
| 01        | Agriculture                                                                                    | 6.18           | 4              | 0.65 (0.30-1.73)  | 5.36           | 4              | 0.75 (0.20-1.91)  | 0.78           | 0              | 0.00 (0.00-0.00)  |
| 02        | Forestry                                                                                       | 1.39           | 3              | 2.15 (0.48-5.12)  | 1.45           | 1              | 1.38 (0.17-4.99)  | 0.10           | 2              | 9.72 (0.25-54.15) |
| 03        | Fishing and aquaculture                                                                        | 4.10           | 4              | 0.98 (0.39-3.51)  | 3.58           | 4              | 1.12 (0.30-2.86)  | 0.59           | 0              | 0.00 (0.00-0.00)  |
| 05        | Mining of coal, crude petroleum and natural gas                                                | 5.70           | 5              | 0.88 (0.29-2.05)  | 6.07           | 4              | 0.66 (0.18-1.69)  | 0.34           | 1              | 2.94 (0.07-16.38) |
| 06        | Mining of metal ores                                                                           | 0.51           | 1              | 1.96 (0.05-10.92) | 0.54           | 1              | 1.86 (0.05-10.34) | 0.03           | 0              | 0.00 (0.00-0.00)  |
| 07        | Mining of non-metallic minerals, except fuel                                                   | 1.93           | 2              | 1.04 (0.13-3.74)  | 2.10           | 2              | 0.95 (0.12-3.44)  | 0.10           | 0              | 0.00 (0.00-0.00)  |
| 08        | Mining support service activities                                                              | 0.54           | 1              | 1.85 (0.05-10.32) | 0.54           | 1              | 1.85 (0.05-10.32) | 0.05           | 0              | 0.00 (0.00-0.00)  |
| 10        | Manufacture of food products                                                                   | 44.72          | 42             | 0.94 (0.70-1.29)  | 27.12          | 38             | 1.40 (0.99-1.92)  | 10.05          | 4              | 0.40 (0.11-1.02)  |
| 11        | Manufacture of beverages                                                                       | 1.97           | 3              | 1.52 (0.42-12.91) | 1.82           | 2              | 1.10 (0.13-3.58)  | 0.22           | 1              | 4.63 (0.12-25.77) |
| 12        | Manufacture of tobacco products                                                                | 0.15           | 0              | 0.00 (0.00-0.00)  | 0.14           | 0              | 0.00 (0.00-0.00)  | 0.02           | 0              | 0.00 (0.00-0.00)  |
| 13        | Manufacture of textiles, except apparel                                                        | 40.40          | 34             | 0.84 (0.62-1.18)  | 30.15          | 29             | 0.96 (0.64-1.38)  | 7.42           | 5              | 0.67 (0.22-1.57)  |
| 14        | Manufacture of wearing apparel, clothing accessories and fur articles                          | 11.14          | 11             | 0.99 (0.55-1.97)  | 6.13           | 9              | 1.47 (0.67-2.79)  | 2.97           | 2              | 0.67 (0.08-2.43)  |
| 15        | Manufacture of leather, luggage and footwear                                                   | 7.34           | 3              | 0.41 (0.20-0.99)  | 5.37           | 3              | 0.56 (0.12-1.63)  | 1.35           | 0              | 0.00 (0.00-0.00)  |
| 16        | Manufacture of wood and of products of wood and cork; except furniture                         | 11.03          | 11             | 1.00 (0.56-2.00)  | 10.59          | 10             | 0.94 (0.45-1.74)  | 1.06           | 1              | 0.94 (0.02-5.24)  |
| 17        | Manufacture of pulp, paper and paper products                                                  | 12.20          | 10             | 0.82 (0.47-1.58)  | 11.80          | 8              | 0.68 (0.29-1.34)  | 1.14           | 2              | 1.75 (0.21-6.32)  |
| 18        | Printing and reproduction of recorded media                                                    | 27.60          | 31             | 1.12 (0.78-1.70)  | 23.29          | 23             | 0.99 (0.63-1.48)  | 4.71           | 8              | 1.70 (0.73-3.35)  |
| 19        | Manufacture of coke, briquettes and refined petroleum products                                 | 3.25           | 3              | 0.92 (0.33-4.12)  | 3.66           | 3              | 0.82 (0.17-2.39)  | 0.12           | 0              | 0.00 (0.00-0.00)  |
| 20        | Manufacture of chemicals and chemical products; except pharmaceuticals and medicinal chemicals | 44.15          | 48             | 1.09 (0.80-1.09)  | 42.22          | 43             | 1.02 (0.74-1.37)  | 4.55           | 5              | 1.10 (0.36-2.56)  |
| 21        | Manufacture of pharmaceuticals, medicinal chemical and botanical products                      | 3.26           | 3              | 0.92 (0.33-4.08)  | 2.73           | 2              | 0.73 (0.09-2.65)  | 0.53           | 1              | 1.90 (0.05-10.98) |
| 22        | Manufacture of rubber and plastics products                                                    | 16.28          | 17             | 1.04 (0.65-1.82)  | 14.40          | 13             | 0.90 (0.48-1.54)  | 2.07           | 4              | 1.93 (0.53-4.95)  |
| 23        | Manufacture of other non-metallic mineral products                                             | 18.30          | 29             | 1.58 (1.01-2.66)  | 18.37          | 25             | 1.36 (0.88-2.01)  | 1.46           | 4              | 2.74 (0.75-7.01)  |
| 24        | Manufacture of basic metals                                                                    | 42.79          | 48             | 1.12 (0.83-1.55)  | 45.51          | 47             | 1.03 (0.76-1.37)  | 2.47           | 1              | 0.40 (0.01-2.24)  |
| 25        | Manufacture of fabricated metal products, except machinery and furniture                       | 40.24          | 36             | 0.89 (0.66-1.25)  | 39.62          | 31             | 0.78 (0.53-1.11)  | 3.58           | 5              | 1.40 (0.45-3.26)  |
| 26        | Manufacture of electronic components, computer; visual, sounding and communication equipment   | 61.23          | 57             | 0.93 (0.73-1.22)  | 48.44          | 44             | 0.91 (0.66-1.22)  | 11.38          | 13             | 1.14 (0.61-1.95)  |

|    |                                                                                                          |        |     |                   |        |     |                  |       |    |                   |
|----|----------------------------------------------------------------------------------------------------------|--------|-----|-------------------|--------|-----|------------------|-------|----|-------------------|
| 27 | Manufacture of medical, precision and optical instruments, watches and clocks                            | 6.11   | 2   | 0.33 (0.15-0.88)  | 5.05   | 2   | 0.40 (0.05-1.43) | 1.00  | 0  | 0.00 (0.00-0.00)  |
| 28 | Manufacture of electrical equipment                                                                      | 25.13  | 32  | 1.27 (0.86-1.97)  | 23.25  | 29  | 1.25 (0.84-1.79) | 2.94  | 3  | 1.02 (0.21-2.98)  |
| 29 | Manufacture of other machinery and equipment                                                             | 55.40  | 61  | 1.10 (0.85-1.46)  | 55.38  | 55  | 0.99 (0.75-1.29) | 4.72  | 6  | 1.27 (0.47-2.77)  |
| 30 | Manufacture of motor vehicles, trailers and semitrailers                                                 | 84.44  | 85  | 1.01 (0.81-1.26)  | 82.21  | 76  | 0.92 (0.73-1.16) | 7.79  | 9  | 1.19 (0.54-2.25)  |
| 31 | Manufacture of other transport equipment                                                                 | 43.42  | 41  | 0.94 (0.70-1.30)  | 47.42  | 39  | 0.82 (0.58-1.12) | 2.03  | 2  | 0.98 (0.12-3.55)  |
| 32 | Manufacture of furniture                                                                                 | 8.22   | 7   | 0.85 (0.44-1.95)  | 7.55   | 6   | 0.79 (0.29-1.73) | 0.92  | 1  | 1.09 (0.03-6.06)  |
| 33 | Other manufacturing                                                                                      | 285.84 | 271 | 0.95 (0.84-1.07)  | 259.75 | 239 | 0.92 (0.81-1.04) | 34.73 | 32 | 0.92 (0.63-1.30)  |
| 35 | Electricity, gas, steam and air conditioning supply                                                      | 28.01  | 34  | 1.21 (0.84-1.83)  | 31.10  | 33  | 1.06 (0.73-1.49) | 1.28  | 1  | 0.78 (0.02-4.35)  |
| 36 | Water supply                                                                                             | 1.87   | 1   | 0.54 (0.14-4.95)  | 2.05   | 1   | 0.49 (0.01-2.72) | 0.10  | 0  | 0.00 (0.00-0.00)  |
| 37 | Sewage, wastewater, human and animal waste treatment services                                            | 1.40   | 2   | 1.43 (0.32-22.93) | 1.27   | 2   | 1.58 (0.19-5.71) | 0.15  | 0  | 0.00 (0.00-0.00)  |
| 38 | Waste collection, treatment and disposal activities; materials recovery                                  | 8.02   | 4   | 0.50 (0.25-1.15)  | 7.89   | 4   | 0.51 (0.14-1.30) | 0.07  | 0  | 0.00 (0.00-0.00)  |
| 41 | General construction                                                                                     | 150.28 | 157 | 1.04 (0.89-1.23)  | 159.35 | 149 | 0.94 (0.79-1.10) | 9.45  | 8  | 0.85 (0.37-1.67)  |
| 42 | Specialized construction activities                                                                      | 92.60  | 119 | 1.29 (1.05-1.59)  | 97.12  | 113 | 1.16 (0.96-1.40) | 6.43  | 6  | 0.93 (0.34-2.03)  |
| 45 | Sale of motor vehicles and parts                                                                         | 12.04  | 14  | 1.16 (0.67-2.25)  | 11.98  | 13  | 1.08 (0.58-1.86) | 1.07  | 1  | 0.93 (0.02-5.18)  |
| 46 | Wholesale trade on own account or on a fee or contract basis                                             | 150.44 | 172 | 1.14 (0.97-1.35)  | 126.22 | 149 | 1.18 (1.00-1.39) | 23.95 | 23 | 0.96 (0.61-1.44)  |
| 47 | Retail trade, except motor vehicles and motorcycles                                                      | 151.58 | 148 | 0.98 (0.83-1.15)  | 118.65 | 116 | 0.98 (0.81-1.17) | 28.16 | 32 | 1.14 (0.78-1.60)  |
| 49 | Land transport and transport via pipelines                                                               | 42.39  | 48  | 1.13 (0.84-1.57)  | 47.27  | 46  | 0.97 (0.71-1.30) | 1.87  | 2  | 1.07 (0.13-3.87)  |
| 50 | Water transport                                                                                          | 12.09  | 14  | 1.16 (0.66-2.24)  | 13.85  | 13  | 0.94 (0.50-1.61) | 0.46  | 1  | 2.18 (0.06-12.17) |
| 51 | Air transport                                                                                            | 1.68   | 4   | 2.38 (0.60-26.49) | 1.72   | 4   | 2.32 (0.63-5.94) | 0.16  | 0  | 0.00 (0.00-0.00)  |
| 52 | Warehousing and support activities for transportation                                                    | 160.76 | 210 | 1.31 (1.12-1.53)  | 182.96 | 204 | 1.12 (0.97-1.28) | 5.99  | 6  | 1.00 (0.37-2.18)  |
| 55 | Accommodation                                                                                            | 16.50  | 17  | 1.03 (0.64-1.79)  | 10.01  | 10  | 1.00 (0.48-1.84) | 3.65  | 7  | 1.92 (0.77-3.95)  |
| 56 | Food and beverage service activities                                                                     | 61.50  | 37  | 0.60 (0.47-0.79)  | 21.68  | 22  | 1.01 (0.64-1.54) | 19.08 | 15 | 0.79 (0.44-1.30)  |
| 59 | Motion picture, video and television program production, sound recording and music publishing activities | 2.34   | 2   | 0.86 (0.26-5.63)  | 2.17   | 2   | 0.92 (0.11-3.33) | 0.33  | 0  | 0.00 (0.00-0.00)  |
| 60 | Broadcasting activities                                                                                  | 1.80   | 0   | 0.00 (0.00-0.00)  | 1.10   | 0   | 0.00 (0.00-0.00) | 0.55  | 0  | 0.00 (0.00-0.00)  |
| 61 | Postal activities and telecommunications                                                                 | 21.69  | 25  | 1.15 (0.76-1.85)  | 22.61  | 25  | 1.11 (0.72-1.63) | 1.69  | 0  | 0.00 (0.00-0.00)  |
| 62 | Computer programming, consultancy and related activities                                                 | 15.16  | 18  | 1.19 (0.72-2.11)  | 13.91  | 16  | 1.15 (0.66-1.87) | 2.24  | 2  | 0.89 (0.11-3.23)  |
| 63 | Information service activities                                                                           | 22.34  | 23  | 1.03 (0.68-1.64)  | 20.22  | 20  | 0.99 (0.60-1.53) | 3.39  | 3  | 0.88 (0.18-2.59)  |
| 64 | Financial service activities, except insurance and pension funding                                       | 84.12  | 91  | 1.08 (0.87-1.36)  | 75.14  | 81  | 1.08 (0.86-1.34) | 14.66 | 10 | 0.68 (0.33-1.25)  |

|    |                                                                                            |        |     |                   |        |     |                  |       |    |                   |
|----|--------------------------------------------------------------------------------------------|--------|-----|-------------------|--------|-----|------------------|-------|----|-------------------|
| 65 | Insurance and pension funding                                                              | 10.71  | 11  | 1.03 (0.57-2.08)  | 9.62   | 8   | 0.83 (0.36-1.64) | 1.90  | 3  | 1.58 (0.33-4.61)  |
| 66 | Activities auxiliary to financial service and insurance activities                         | 4.89   | 5   | 1.02 (0.43-3.20)  | 4.11   | 5   | 1.22 (0.39-2.84) | 0.93  | 0  | 0.00 (0.00-0.00)  |
| 68 | Real estate activities                                                                     | 173.88 | 162 | 0.93 (0.80-1.09)  | 150.84 | 140 | 0.93 (0.78-1.10) | 20.68 | 22 | 1.06 (0.67-1.61)  |
| 70 | Research and development                                                                   | 1.91   | 3   | 1.57 (0.42-14.04) | 1.72   | 3   | 1.75 (0.36-5.11) | 0.30  | 0  | 0.00 (0.00-0.00)  |
| 71 | Professional services                                                                      | 43.55  | 47  | 1.08 (0.80-1.49)  | 34.60  | 42  | 1.21 (0.87-1.64) | 9.26  | 5  | 0.54 (0.18-1.26)  |
| 72 | Architectural, engineering and other scientific technical services                         | 36.64  | 37  | 1.01 (0.73-1.44)  | 37.98  | 36  | 0.95 (0.66-1.31) | 2.93  | 1  | 0.34 (0.01-1.90)  |
| 73 | Other professional, scientific and technical services                                      | 4.77   | 4   | 0.84 (0.35-2.67)  | 4.00   | 4   | 1.00 (0.27-2.56) | 0.82  | 0  | 0.00 (0.00-0.00)  |
| 74 | Business facilities management and landscape services                                      | 50.90  | 49  | 0.96 (0.73-1.29)  | 33.54  | 40  | 1.19 (0.85-1.62) | 8.62  | 9  | 1.06 (0.48-2.01)  |
| 75 | Business support services                                                                  | 133.97 | 117 | 0.87 (0.74-1.04)  | 97.08  | 86  | 0.89 (0.71-1.09) | 25.17 | 31 | 1.23 (0.84-1.75)  |
| 76 | Rental and leasing activities; except real estate                                          | 6.66   | 12  | 1.80 (0.86-4.61)  | 6.44   | 8   | 1.24 (0.54-2.45) | 0.72  | 4  | 5.53 (1.51-14.15) |
| 84 | Public administration and defence; compulsory social security                              | 25.08  | 30  | 1.20 (0.81-1.85)  | 21.14  | 27  | 1.28 (0.84-1.86) | 3.93  | 3  | 0.76 (0.16-2.23)  |
| 85 | Education                                                                                  | 92.19  | 69  | 0.75 (0.61-0.93)  | 27.91  | 30  | 1.07 (0.73-1.53) | 38.81 | 39 | 1.00 (0.71-1.37)  |
| 86 | Human health activities                                                                    | 100.31 | 102 | 1.02 (0.84-1.25)  | 49.85  | 61  | 1.22 (0.94-1.57) | 33.21 | 41 | 1.23 (0.89-1.67)  |
| 87 | Social work activities                                                                     | 66.74  | 51  | 0.76 (0.60-0.99)  | 20.23  | 31  | 1.53 (1.04-2.18) | 24.40 | 20 | 0.82 (0.50-1.27)  |
| 90 | Creative, arts and recreation related services                                             | 2.93   | 2   | 0.68 (0.23-3.39)  | 2.13   | 2   | 0.94 (0.11-3.39) | 0.64  | 0  | 0.00 (0.00-0.00)  |
| 91 | Sports activities and amusement activities                                                 | 37.78  | 34  | 0.90 (0.66-1.27)  | 29.31  | 28  | 0.96 (0.63-1.38) | 6.13  | 6  | 0.98 (0.36-2.13)  |
| 94 | Membership organizations                                                                   | 72.14  | 60  | 0.83 (0.66-1.06)  | 56.70  | 51  | 0.90 (0.67-1.18) | 11.91 | 9  | 0.76 (0.35-1.43)  |
| 95 | Maintenance and repair services of personal and household goods                            | 17.96  | 12  | 0.67 (0.42-1.13)  | 18.11  | 8   | 0.44 (0.19-0.87) | 1.62  | 4  | 2.46 (0.67-6.31)  |
| 96 | Other personal services activities                                                         | 62.29  | 64  | 1.03 (0.80-1.34)  | 44.93  | 56  | 1.25 (0.94-1.62) | 12.01 | 8  | 0.67 (0.29-1.31)  |
| 98 | Undifferentiated goods-and services-producing activities of private households for own use | 18.77  | 14  | 0.75 (0.48-1.24)  | 16.36  | 14  | 0.86 (0.47-1.44) | 2.33  | 0  | 0.00 (0.00-0.00)  |
| 99 | Activities of extraterritorial organizations and bodies                                    | 6.51   | 3   | 0.46 (0.22-1.20)  | 6.08   | 2   | 0.33 (0.04-1.19) | 0.68  | 1  | 1.48 (0.04-8.24)  |
|    | Non-confirmed                                                                              | 505.88 | 497 | 0.98 (0.90-1.07)  | 434.49 | 408 | 0.94 (0.85-1.03) | 79.77 | 89 | 1.12 (0.90-1.37)  |

**Supplementary Table S3.** Age-standardized incidence ratio (SIR) and 95% confidence interval (CI) of malignant neoplasm of oesophagus according to divisions of the Korean Standard Industrial Classification (KSIC).

| KSIC      |                                                                                                | Total workers  |                |                   | Male workers   |                |                   | Female workers |                |                    |
|-----------|------------------------------------------------------------------------------------------------|----------------|----------------|-------------------|----------------|----------------|-------------------|----------------|----------------|--------------------|
| Divisions | Description                                                                                    | Expected cases | Observed cases | SIR (95% CI)      | Expected cases | Observed cases | SIR (95% CI)      | Expected cases | Observed cases | SIR (95% CI)       |
| 01        | Agriculture                                                                                    | 3.75           | 6              | 1.60 (0.59-3.48)  | 3.54           | 4              | 1.13 (0.31-2.90)  | 0.13           | 2              | 15.83 (1.92-57.20) |
| 02        | Forestry                                                                                       | 0.95           | 3              | 3.16 (0.65-9.23)  | 1.12           | 3              | 2.69 (0.55-7.85)  | 0.01           | 0              | 0.00 (0.00-0.00)   |
| 03        | Fishing and aquaculture                                                                        | 2.38           | 0              | 0.00 (0.00-0.00)  | 2.48           | 0              | 0.00 (0.00-0.00)  | 0.07           | 0              | 0.00 (0.00-0.00)   |
| 05        | Mining of coal, crude petroleum and natural gas                                                | 3.61           | 5              | 1.39 (0.52-5.58)  | 4.25           | 5              | 1.18 (0.38-2.75)  | 0.05           | 0              | 0.00 (0.00-0.00)   |
| 06        | Mining of metal ores                                                                           | 0.31           | 1              | 3.21 (0.08-17.86) | 0.36           | 1              | 2.75 (0.07-15.35) | 0.00           | 0              | 0.00 (0.00-0.00)   |
| 07        | Mining of non-metallic minerals, except fuel                                                   | 1.31           | 2              | 1.53 (0.19-5.53)  | 1.57           | 2              | 1.28 (0.15-4.61)  | 0.02           | 0              | 0.00 (0.00-0.00)   |
| 08        | Mining support service activities                                                              | 0.36           | 0              | 0.00 (0.00-10.16) | 0.40           | 0              | 0.00 (0.00-0.00)  | 0.01           | 0              | 0.00 (0.00-0.00)   |
| 10        | Manufacture of food products                                                                   | 24.30          | 11             | 0.45 (0.23-0.81)  | 15.03          | 11             | 0.73 (0.37-1.31)  | 1.51           | 0              | 0.00 (0.00-0.00)   |
| 11        | Manufacture of beverages                                                                       | 0.97           | 0              | 0.00 (0.00-0.00)  | 0.96           | 0              | 0.00 (0.00-0.00)  | 0.03           | 0              | 0.00 (0.00-0.00)   |
| 12        | Manufacture of tobacco products                                                                | 0.07           | 0              | 0.00 (0.00-0.00)  | 0.07           | 0              | 0.00 (0.00-0.00)  | 0.00           | 0              | 0.00 (0.00-0.00)   |
| 13        | Manufacture of textiles, except apparel                                                        | 21.94          | 14             | 0.64 (0.35-1.072) | 18.12          | 14             | 0.77 (0.42-1.30)  | 1.00           | 0              | 0.00 (0.00-0.00)   |
| 14        | Manufacture of wearing apparel, clothing accessories and fur articles                          | 5.76           | 2              | 0.35 (0.04-1.25)  | 3.42           | 2              | 0.59 (0.07-2.12)  | 0.39           | 0              | 0.00 (0.00-0.00)   |
| 15        | Manufacture of leather, luggage and footwear                                                   | 4.20           | 4              | 0.95 (0.26-2.44)  | 3.36           | 4              | 1.19 (0.32-3.04)  | 0.20           | 0              | 0.00 (0.00-0.00)   |
| 16        | Manufacture of wood and of products of wood and cork; except furniture                         | 6.57           | 8              | 1.22 (0.58-3.14)  | 7.00           | 8              | 1.14 (0.49-2.25)  | 0.15           | 0              | 0.00 (0.00-0.00)   |
| 17        | Manufacture of pulp, paper and paper products                                                  | 6.62           | 1              | 0.15 (0.07-0.39)  | 7.03           | 1              | 0.14 (0.00-0.79)  | 0.16           | 0              | 0.00 (0.00-0.00)   |
| 18        | Printing and reproduction of recorded media                                                    | 12.47          | 16             | 1.28 (0.74-2.45)  | 12.47          | 16             | 1.28 (0.73-2.08)  | 0.43           | 0              | 0.00 (0.00-0.00)   |
| 19        | Manufacture of coke, briquettes and refined petroleum products                                 | 1.35           | 1              | 0.74 (0.16-12.85) | 1.73           | 1              | 0.58 (0.01-3.23)  | 0.01           | 0              | 0.00 (0.00-0.00)   |
| 20        | Manufacture of chemicals and chemical products; except pharmaceuticals and medicinal chemicals | 20.95          | 26             | 1.24 (0.81-2.01)  | 22.26          | 25             | 1.12 (0.73-1.66)  | 0.53           | 1              | 1.88 (0.05-10.47)  |
| 21        | Manufacture of pharmaceuticals, medicinal chemical and botanical products                      | 1.38           | 0              | 0.00 (0.00-0.00)  | 1.29           | 0              | 0.00 (0.00-0.00)  | 0.05           | 0              | 0.00 (0.00-0.00)   |
| 22        | Manufacture of rubber and plastics products                                                    | 8.44           | 8              | 0.95 (0.49-2.14)  | 8.25           | 8              | 0.97 (0.42-1.91)  | 0.27           | 0              | 0.00 (0.00-0.00)   |
| 23        | Manufacture of other non-metallic mineral products                                             | 10.16          | 9              | 0.89 (0.48-1.84)  | 11.25          | 9              | 0.80 (0.37-1.52)  | 0.20           | 0              | 0.00 (0.00-0.00)   |
| 24        | Manufacture of basic metals                                                                    | 22.83          | 22             | 0.96 (0.64-1.52)  | 26.97          | 22             | 0.82 (0.51-1.23)  | 0.32           | 0              | 0.00 (0.00-0.00)   |
| 25        | Manufacture of fabricated metal products, except machinery and furniture                       | 20.33          | 24             | 1.18 (0.77-1.92)  | 22.27          | 24             | 1.08 (0.69-1.60)  | 0.45           | 0              | 0.00 (0.00-0.00)   |
| 26        | Manufacture of electronic components, computer; visual, sounding and communication equipment   | 20.96          | 16             | 0.76 (0.50-1.23)  | 18.62          | 16             | 0.86 (0.49-1.40)  | 1.00           | 0              | 0.00 (0.00-0.00)   |

|    |                                                                                                          |        |     |                    |        |     |                   |      |   |                   |
|----|----------------------------------------------------------------------------------------------------------|--------|-----|--------------------|--------|-----|-------------------|------|---|-------------------|
| 27 | Manufacture of medical, precision and optical instruments, watches and clocks                            | 2.59   | 3   | 1.16 (0.37-6.68)   | 2.42   | 3   | 1.24 (0.26-3.62)  | 0.10 | 0 | 0.00 (0.00-0.00)  |
| 28 | Manufacture of electrical equipment                                                                      | 11.73  | 10  | 0.85 (0.49-1.66)   | 12.23  | 9   | 0.74 (0.34-1.40)  | 0.33 | 1 | 3.03 (0.08-16.88) |
| 29 | Manufacture of other machinery and equipment                                                             | 26.76  | 22  | 0.82 (0.56-1.25)   | 29.99  | 22  | 0.73 (0.46-1.11)  | 0.54 | 0 | 0.00 (0.00-0.00)  |
| 30 | Manufacture of motor vehicles, trailers and semitrailers                                                 | 36.14  | 23  | 0.64 (0.46-0.91)   | 38.15  | 23  | 0.60 (0.38-0.90)  | 0.94 | 0 | 0.00 (0.00-0.00)  |
| 31 | Manufacture of other transport equipment                                                                 | 22.96  | 24  | 1.05 (0.70-1.65)   | 28.05  | 23  | 0.82 (0.52-1.23)  | 0.24 | 1 | 4.15 (0.11-23.13) |
| 32 | Manufacture of furniture                                                                                 | 4.28   | 2   | 0.47 (0.19-1.62)   | 4.30   | 2   | 0.46 (0.06-1.68)  | 0.13 | 0 | 0.00 (0.00-0.00)  |
| 33 | Other manufacturing                                                                                      | 138.83 | 121 | 0.87 (0.74-1.04)   | 139.73 | 117 | 0.84 (0.69-1.00)  | 4.18 | 4 | 0.96 (0.26-2.45)  |
| 35 | Electricity, gas, steam and air conditioning supply                                                      | 14.63  | 17  | 1.16 (0.70-2.09)   | 18.46  | 17  | 0.92 (0.54-1.47)  | 0.11 | 0 | 0.00 (0.00-0.00)  |
| 36 | Water supply                                                                                             | 0.95   | 1   | 1.05 (0.03-6.86)   | 0.85   | 1   | 0.85 (0.02-4.71)  | 0.01 | 0 | 0.00 (0.00-0.00)  |
| 37 | Sewage, wastewater, human and animal waste treatment services                                            | 1.01   | 1   | 0.99 (0.18-38.37)  | 0.96   | 1   | 1.04 (0.03-5.79)  | 0.03 | 0 | 0.00 (0.00-0.00)  |
| 38 | Waste collection, treatment and disposal activities; materials recovery                                  | 5.26   | 7   | 1.33 (0.58-3.96)   | 5.65   | 7   | 1.24 (0.50-2.55)  | 0.12 | 0 | 0.00 (0.00-0.00)  |
| 41 | General construction                                                                                     | 83.45  | 119 | 1.43 (1.15-1.79)   | 98.62  | 116 | 1.18 (0.97-1.41)  | 1.17 | 3 | 2.57 (0.53-7.51)  |
| 42 | Specialized construction activities                                                                      | 49.87  | 83  | 1.66 (1.26-2.24)   | 58.99  | 79  | 1.34 (1.06-1.67)  | 0.72 | 4 | 5.59 (1.52-14.31) |
| 45 | Sale of motor vehicles and parts                                                                         | 5.48   | 9   | 1.64 (0.73-4.75)   | 6.15   | 8   | 1.30 (0.56-2.56)  | 0.11 | 1 | 8.75 (0.22-48.77) |
| 46 | Wholesale trade on own account or on a fee or contract basis                                             | 74.94  | 87  | 1.16 (0.93-1.48)   | 72.03  | 84  | 1.17 (0.93-1.44)  | 2.67 | 3 | 1.12 (0.23-3.28)  |
| 47 | Retail trade, except motor vehicles and motorcycles                                                      | 72.90  | 74  | 1.02 (0.81-1.30)   | 66.19  | 70  | 1.06 (0.82-1.34)  | 3.04 | 4 | 1.32 (0.36-3.37)  |
| 49 | Land transport and transport via pipelines                                                               | 26.03  | 27  | 1.04 (0.71-1.59)   | 32.42  | 27  | 0.83 (0.55-1.21)  | 0.21 | 0 | 0.00 (0.00-0.00)  |
| 50 | Water transport                                                                                          | 8.52   | 7   | 0.82 (0.43-1.85)   | 10.88  | 7   | 0.64 (0.26-1.33)  | 0.04 | 0 | 0.00 (0.00-0.00)  |
| 51 | Air transport                                                                                            | 0.77   | 1   | 1.30 (0.19-134.69) | 0.94   | 1   | 1.07 (0.03-5.95)  | 0.01 | 0 | 0.00 (0.00-0.00)  |
| 52 | Warehousing and support activities for transportation                                                    | 105.35 | 129 | 1.22 (1.02-1.46)   | 133.31 | 128 | 0.96 (0.80-1.14)  | 0.64 | 1 | 1.56 (0.04-8.68)  |
| 55 | Accommodation                                                                                            | 9.39   | 4   | 0.43 (0.23-0.91)   | 5.67   | 4   | 0.71 (0.19-1.81)  | 0.58 | 0 | 0.00 (0.00-0.00)  |
| 56 | Food and beverage service activities                                                                     | 36.30  | 24  | 0.66 (0.48-0.94)   | 12.28  | 16  | 1.30 (0.74-2.12)  | 3.12 | 8 | 2.56 (1.11-5.05)  |
| 59 | Motion picture, video and television program production, sound recording and music publishing activities | 0.86   | 2   | 2.31 (0.28-8.36)   | 0.97   | 2   | 2.06 (0.25-7.44)  | 0.02 | 0 | 0.00 (0.00-0.00)  |
| 60 | Broadcasting activities                                                                                  | 0.65   | 1   | 1.53 (0.20-332.85) | 0.52   | 1   | 1.94 (0.05-10.80) | 0.04 | 0 | 0.00 (0.00-0.00)  |
| 61 | Postal activities and telecommunications                                                                 | 9.09   | 4   | 0.44 (0.23-0.96)   | 11.00  | 4   | 0.36 (0.10-0.93)  | 0.13 | 0 | 0.00 (0.00-0.00)  |
| 62 | Computer programming, consultancy and related activities                                                 | 3.87   | 2   | 0.52 (0.06-1.86)   | 4.38   | 2   | 0.46 (0.06-1.65)  | 0.11 | 0 | 0.00 (0.00-0.00)  |
| 63 | Information service activities                                                                           | 6.13   | 7   | 1.14 (0.53-3.07)   | 6.72   | 6   | 0.89 (0.33-1.94)  | 0.19 | 1 | 5.17 (0.13-28.79) |
| 64 | Financial service activities, except insurance and pension funding                                       | 32.75  | 26  | 0.79 (0.52-1.16)   | 37.71  | 26  | 0.69 (0.45-1.01)  | 0.83 | 0 | 0.00 (0.00-0.00)  |



|    |                                                                                            |        |     |                   |        |     |                  |      |   |                  |
|----|--------------------------------------------------------------------------------------------|--------|-----|-------------------|--------|-----|------------------|------|---|------------------|
| 65 | Insurance and pension funding                                                              | 3.74   | 2   | 0.53 (0.20-2.08)  | 4.40   | 2   | 0.45 (0.06-1.64) | 3.74 | 0 | 0.00 (0.00-0.00) |
| 66 | Activities auxiliary to financial service and insurance activities                         | 1.88   | 2   | 1.06 (0.13-3.84)  | 1.94   | 2   | 1.03 (0.13-3.73) | 0.07 | 0 | 0.00 (0.00-0.00) |
| 68 | Real estate activities                                                                     | 133.36 | 157 | 1.18 (0.99-1.41)  | 124.46 | 154 | 1.23 (1.04-1.44) | 4.46 | 3 | 0.67 (0.14-1.97) |
| 70 | Research and development                                                                   | 0.78   | 0   | 0.00 (0.00-0.00)  | 0.86   | 0   | 0.00 (0.00-0.00) | 0.02 | 0 | 0.00 (0.00-0.00) |
| 71 | Professional services                                                                      | 20.84  | 20  | 0.96 (0.63-1.55)  | 21.49  | 20  | 0.93 (0.57-1.44) | 0.70 | 0 | 0.00 (0.00-0.00) |
| 72 | Architectural, engineering and other scientific technical services                         | 20.64  | 23  | 1.11 (0.71-1.67)  | 24.51  | 23  | 0.94 (0.59-1.41) | 0.28 | 0 | 0.00 (0.00-0.00) |
| 73 | Other professional, scientific and technical services                                      | 2.03   | 3   | 1.47 (0.30-4.31)  | 1.99   | 3   | 1.51 (0.31-4.41) | 0.07 | 0 | 0.00 (0.00-0.00) |
| 74 | Business facilities management and landscape services                                      | 43.05  | 44  | 1.02 (0.74-1.37)  | 30.20  | 42  | 1.39 (1.00-1.88) | 2.31 | 2 | 0.87 (0.11-3.13) |
| 75 | Business support services                                                                  | 89.46  | 72  | 0.80 (0.65-1.00)  | 74.24  | 69  | 0.93 (0.72-1.18) | 3.99 | 3 | 0.75 (0.16-2.20) |
| 76 | Rental and leasing activities; except real estate                                          | 3.35   | 2   | 0.60 (0.22-2.58)  | 3.72   | 2   | 0.54 (0.07-1.94) | 0.07 | 0 | 0.00 (0.00-0.00) |
| 84 | Public administration and defence; compulsory social security                              | 15.21  | 28  |                   | 15.05  | 28  | 1.86 (1.24-2.69) | 0.48 | 0 | 0.00 (0.00-0.00) |
| 85 | Education                                                                                  | 40.58  | 14  | 0.35 (0.25-0.48)  | 18.31  | 12  | 0.66 (0.34-1.14) | 3.69 | 2 | 0.54 (0.07-1.96) |
| 86 | Human health activities                                                                    | 48.43  | 35  | 0.72 (0.55-0.98)  | 30.57  | 32  | 1.05 (0.72-1.48) | 3.37 | 3 | 0.89 (0.18-2.60) |
| 87 | Social work activities                                                                     | 36.98  | 11  | 0.30 (0.22-0.42)  | 12.94  | 7   | 0.54 (0.22-1.11) | 3.26 | 4 | 1.23 (0.33-3.15) |
| 90 | Creative, arts and recreation related services                                             | 1.39   | 3   | 2.15 (0.48-35.04) | 1.17   | 3   | 2.56 (0.53-7.47) | 0.07 | 0 | 0.00 (0.00-0.00) |
| 91 | Sports activities and amusement activities                                                 | 25.78  | 39  | 1.51 (1.03-2.32)  | 22.17  | 39  | 1.76 (1.25-2.40) | 1.07 | 0 | 0.00 (0.00-0.00) |
| 94 | Membership organizations                                                                   | 45.93  | 35  | 0.76 (0.57-1.04)  | 40.40  | 34  | 0.84 (0.58-1.18) | 1.86 | 1 | 0.54 (0.01-2.99) |
| 95 | Maintenance and repair services of personal and household goods                            | 7.74   | 7   | 0.90 (0.36-1.86)  | 9.04   | 7   | 0.77 (0.31-1.60) | 0.14 | 0 | 0.00 (0.00-0.00) |
| 96 | Other personal services activities                                                         | 38.63  | 46  | 1.19 (0.87-1.59)  | 31.94  | 43  | 1.35 (0.97-1.81) | 1.75 | 3 | 1.71 (0.35-5.01) |
| 98 | Undifferentiated goods-and services-producing activities of private households for own use | 15.88  | 12  | 0.76 (0.39-1.32)  | 15.65  | 12  | 0.77 (0.40-1.34) | 0.46 | 0 | 0.00 (0.00-0.00) |
| 99 | Activities of extraterritorial organizations and bodies                                    | 4.53   | 9   | 1.99 (0.91-3.77)  | 4.67   | 9   | 1.93 (0.88-3.66) | 0.12 | 0 | 0.00 (0.00-0.00) |
|    | Non-confirmed                                                                              | 270.37 | 284 | 1.05 (0.93-1.19)  | 275.60 | 275 | 1.00 (0.88-1.12) | 8.31 | 9 | 1.08 (0.50-2.06) |

**Supplementary Table S4.** Age-standardized incidence ratio (SIR) and 95% confidence interval (CI) of malignant neoplasm of stomach according to divisions of the Korean Standard Industrial Classification (KSIC).

| KSIC      |                                                                                                | Total workers  |                |                  | Male workers   |                |                  | Female workers |                |                   |
|-----------|------------------------------------------------------------------------------------------------|----------------|----------------|------------------|----------------|----------------|------------------|----------------|----------------|-------------------|
| Divisions | Description                                                                                    | Expected cases | Observed cases | SIR (95% CI)     | Expected cases | Observed cases | SIR (95% CI)     | Expected cases | Observed cases | SIR (95% CI)      |
| 01        | Agriculture                                                                                    | 62.09          | 52             | 0.84 (0.65-1.09) | 52.12          | 48             | 0.92 (0.68-1.22) | 62.09          | 52             | 0.44 (0.12-1.12)  |
| 02        | Forestry                                                                                       | 14.47          | 13             | 0.90 (0.54-1.62) | 14.82          | 13             | 0.88 (0.47-1.50) | 1.14           | 0              | 0.00 (0.00-0.00)  |
| 03        | Fishing and aquaculture                                                                        | 41.09          | 47             | 1.14 (0.84-1.59) | 35.54          | 42             | 1.18 (0.85-1.60) | 6.48           | 5              | 0.77 (0.25-1.80)  |
| 05        | Mining of coal, crude petroleum and natural gas                                                | 57.83          | 79             | 1.37 (1.06-1.80) | 60.30          | 72             | 1.19 (0.93-1.50) | 3.86           | 7              | 1.82 (0.73-3.74)  |
| 06        | Mining of metal ores                                                                           | 5.12           | 4              | 0.78 (0.34-2.37) | 5.25           | 4              | 0.76 (0.21-1.95) | 0.36           | 0              | 0.00 (0.00-0.00)  |
| 07        | Mining of non-metallic minerals, except fuel                                                   | 20.01          | 27             | 1.35 (0.87-2.21) | 21.26          | 26             | 1.22 (0.80-1.79) | 1.14           | 1              | 0.87 (0.02-4.87)  |
| 08        | Mining support service activities                                                              | 5.59           | 4              | 0.72 (0.32-2.04) | 5.49           | 3              | 0.55 (0.11-1.60) | 0.51           | 1              | 1.95 (0.05-10.84) |
| 10        | Manufacture of food products                                                                   | 438.33         | 372            | 0.85 (0.77-0.93) | 251.83         | 248            | 0.98 (0.87-1.12) | 115.43         | 124            | 1.07 (0.89-1.28)  |
| 11        | Manufacture of beverages                                                                       | 18.89          | 22             | 1.16 (0.74-1.94) | 16.78          | 21             | 1.25 (0.77-1.91) | 2.39           | 1              | 0.42 (0.01-2.33)  |
| 12        | Manufacture of tobacco products                                                                | 1.41           | 0              | 0.00 (0.00-0.00) | 1.22           | 0              | 0.00 (0.00-0.00) | 0.18           | 0              | 0.00 (0.00-0.00)  |
| 13        | Manufacture of textiles, except apparel                                                        | 397.44         | 366            | 0.92 (0.83-1.02) | 288.33         | 279            | 0.97 (0.86-1.09) | 83.35          | 87             | 1.04 (0.84-1.29)  |
| 14        | Manufacture of wearing apparel, clothing accessories and fur articles                          | 107.89         | 70             | 0.65 (0.54-0.79) | 57.39          | 46             | 0.80 (0.59-1.07) | 32.78          | 24             | 0.73 (0.47-1.09)  |
| 15        | Manufacture of leather, luggage and footwear                                                   | 72.86          | 67             | 0.92 (0.73-1.17) | 51.77          | 52             | 1.00 (0.75-1.32) | 15.36          | 15             | 0.98 (0.55-1.61)  |
| 16        | Manufacture of wood and of products of wood and cork; except furniture                         | 110.47         | 120            | 1.09 (0.90-1.32) | 103.20         | 109            | 1.06 (0.87-1.27) | 12.17          | 11             | 0.90 (0.45-1.62)  |
| 17        | Manufacture of pulp, paper and paper products                                                  | 120.00         | 160            | 1.33 (1.12-1.61) | 112.53         | 139            | 1.24 (1.04-1.46) | 13.00          | 21             | 1.62 (1.00-2.48)  |
| 18        | Printing and reproduction of recorded media                                                    | 259.57         | 243            | 0.94 (0.83-1.06) | 216.27         | 190            | 0.88 (0.76-1.01) | 47.807         | 53             | 1.11 (0.83-1.45)  |
| 19        | Manufacture of coke, briquettes and refined petroleum products                                 | 30.91          | 37             | 1.20 (0.84-1.76) | 33.85          | 36             | 1.06 (0.74-1.47) | 1.12           | 1              | 0.89 (0.02-4.98)  |
| 20        | Manufacture of chemicals and chemical products; except pharmaceuticals and medicinal chemicals | 418.32         | 457            | 1.09 (0.99-1.21) | 387.22         | 406            | 1.05 (0.95-1.16) | 48.61          | 51             | 1.05 (0.78-1.38)  |
| 21        | Manufacture of pharmaceuticals, medicinal chemical and botanical products                      | 30.04          | 25             | 0.83 (0.58-1.23) | 24.22          | 18             | 0.74 (0.44-1.17) | 5.50           | 7              | 1.27 (0.51-2.62)  |
| 22        | Manufacture of rubber and plastics products                                                    | 157.97         | 157            | 0.99 (0.85-1.17) | 134.71         | 127            | 0.94 (0.79-1.12) | 23.41          | 30             | 1.28 (0.86-1.83)  |
| 23        | Manufacture of other non-metallic mineral products                                             | 180.05         | 200            | 1.11 (0.96-1.29) | 175.23         | 181            | 1.03 (0.89-1.19) | 16.47          | 19             | 1.15 (0.69-1.80)  |
| 24        | Manufacture of basic metals                                                                    | 418.12         | 495            | 1.18 (1.08-1.31) | 431.64         | 464            | 1.07 (0.98-1.18) | 27.56          | 31             | 1.12 (0.76-1.60)  |
| 25        | Manufacture of fabricated metal products, except machinery and furniture                       | 387.25         | 432            | 1.12 (1.01-1.24) | 368.74         | 391            | 1.06 (0.96-1.17) | 39.51          | 41             | 1.04 (0.74-1.41)  |
| 26        | Manufacture of electronic components, computer; visual, sounding and communication equipment   | 541.52         | 484            | 0.89 (0.82-0.97) | 405.63         | 361            | 0.89 (0.80-0.99) | 117.67         | 123            | 1.05 (0.87-1.25)  |

|    |                                                                                                          |          |       |                  |          |       |                  |        |     |                  |
|----|----------------------------------------------------------------------------------------------------------|----------|-------|------------------|----------|-------|------------------|--------|-----|------------------|
| 27 | Manufacture of medical, precision and optical instruments, watches and clocks                            | 56.62    | 56    | 0.99 (0.76-1.31) | 44.91    | 48    | 1.07 (0.79-1.42) | 10.67  | 8   | 0.75 (0.32-1.48) |
| 28 | Manufacture of electrical equipment                                                                      | 237.90   | 226   | 0.95 (0.84-1.08) | 212.60   | 200   | 0.94 (0.82-1.08) | 32.06  | 26  | 0.81 (0.53-1.19) |
| 29 | Manufacture of other machinery and equipment                                                             | 528.10   | 565   | 1.07 (0.98-1.17) | 510.8    | 517   | 1.01 (0.93-1.10) | 51.21  | 48  | 0.94 (0.69-1.24) |
| 30 | Manufacture of motor vehicles, trailers and semitrailers                                                 | 795.17   | 803   | 1.01 (0.94-1.08) | 741.00   | 717   | 0.97 (0.90-1.04) | 86.44  | 86  | 1.02 (0.81-1.26) |
| 31 | Manufacture of other transport equipment                                                                 | 418.52   | 520   | 1.24 (1.13-1.37) | 443.94   | 502   | 1.13 (1.03-1.23) | 22.17  | 18  | 0.81 (0.48-1.28) |
| 32 | Manufacture of furniture                                                                                 | 79.81    | 93    | 1.17 (0.94-1.47) | 70.77    | 77    | 1.09 (0.86-1.36) | 10.37  | 16  | 1.54 (0.88-2.51) |
| 33 | Other manufacturing                                                                                      | 2,719.96 | 2,846 | 1.05 (1.01-1.09) | 2,389.06 | 2,480 | 1.04 (1.00-1.08) | 374.97 | 366 | 0.98 (0.88-1.08) |
| 35 | Electricity, gas, steam and air conditioning supply                                                      | 272.52   | 323   | 1.19 (1.05-1.34) | 296.02   | 311   | 1.05 (0.94-1.17) | 13.14  | 12  | 0.91 (0.47-1.59) |
| 36 | Water supply                                                                                             | 18.10    | 18    | 0.99 (0.63-1.68) | 19.41    | 18    | 0.93 (0.55-1.47) | 1.01   | 0   | 0.00 (0.00-0.00) |
| 37 | Sewage, wastewater, human and animal waste treatment services                                            | 14.76    | 15    | 1.02 (0.61-1.83) | 12.87    | 14    | 1.09 (0.59-1.83) | 1.87   | 1   | 0.53 (0.01-2.97) |
| 38 | Waste collection, treatment and disposal activities; materials recovery                                  | 82.37    | 98    | 1.19 (0.96-1.50) | 78.88    | 90    | 1.14 (0.92-1.40) | 8.02   | 8   | 1.00 (0.43-1.97) |
| 41 | General construction                                                                                     | 1,485.50 | 1,568 | 1.06 (1.00-1.11) | 1,536.90 | 1,458 | 0.95 (0.90-1.00) | 101.50 | 110 | 1.08 (0.89-1.31) |
| 42 | Specialized construction activities                                                                      | 910.48   | 1,025 | 1.13 (1.05-1.20) | 933.09   | 947   | 1.01 (0.95-1.08) | 68.59  | 78  | 1.18 (0.90-1.42) |
| 45 | Sale of motor vehicles and parts                                                                         | 113.44   | 133   | 1.17 (0.98-1.42) | 109.19   | 118   | 1.08 (0.89-1.29) | 11.39  | 15  | 1.32 (0.74-2.17) |
| 46 | Wholesale trade on own account or on a fee or contract basis                                             | 1,441.20 | 1,372 | 0.95 (0.90-1.00) | 1,181.02 | 1,142 | 0.97 (0.91-1.02) | 255.17 | 230 | 0.90 (0.79-1.03) |
| 47 | Retail trade, except motor vehicles and motorcycles                                                      | 1,439.08 | 1,351 | 0.94 (0.89-0.99) | 1,098.58 | 1,058 | 0.96 (0.91-1.02) | 300.16 | 293 | 0.98 (0.87-1.09) |
| 49 | Land transport and transport via pipelines                                                               | 428.41   | 553   | 1.29 (1.17-1.42) | 468.00   | 526   | 1.12 (1.03-1.22) | 19.91  | 27  | 1.36 (0.89-1.97) |
| 50 | Water transport                                                                                          | 125.27   | 158   | 1.26 (1.06-1.51) | 141.47   | 155   | 1.10 (0.93-1.28) | 4.27   | 3   | 0.70 (0.15-2.06) |
| 51 | Air transport                                                                                            | 15.75    | 17    | 1.08 (0.66-1.90) | 16.07    | 16    | 1.00 (0.57-1.62) | 1.41   | 1   | 0.71 (0.02-3.98) |
| 52 | Warehousing and support activities for transportation                                                    | 1,651.72 | 2,065 | 1.25 (1.19-1.31) | 1,845.13 | 2,004 | 1.09 (1.04-1.13) | 62.24  | 61  | 0.98 (0.75-1.26) |
| 55 | Accommodation                                                                                            | 161.30   | 138   | 0.86 (0.73-1.00) | 92.57    | 91    | 0.98 (0.79-1.21) | 41.6   | 4   | 1.13 (0.83-1.50) |
| 56 | Food and beverage service activities                                                                     | 614.44   | 385   | 0.63 (0.58-0.68) | 199.93   | 179   | 0.90 (0.77-1.04) | 225.21 | 206 | 0.91 (0.79-1.05) |
| 59 | Motion picture, video and television program production, sound recording and music publishing activities | 20.86    | 17    | 0.81 (0.53-1.32) | 19.17    | 14    | 0.73 (0.40-1.23) | 3.04   | 3   | 0.99 (0.20-2.88) |
| 60 | Broadcasting activities                                                                                  | 15.66    | 20    | 1.28 (0.78-2.25) | 9.56     | 9     | 0.94 (0.43-1.79) | 5.25   | 11  | 2.10 (1.05-3.75) |
| 61 | Postal activities and telecommunications                                                                 | 205.13   | 221   | 1.08 (0.94-1.24) | 209.52   | 203   | 0.97 (0.84-1.11) | 17.18  | 18  | 1.05 (0.62-1.66) |
| 62 | Computer programming, consultancy and related activities                                                 | 125.20   | 102   | 0.81 (0.68-0.98) | 111.90   | 83    | 0.74 (0.59-0.92) | 19.57  | 19  | 0.97 (0.58-1.52) |
| 63 | Information service activities                                                                           | 186.89   | 177   | 0.95 (0.82-1.10) | 164.11   | 151   | 0.92 (0.78-1.08) | 30.49  | 26  | 0.85 (0.56-1.25) |
| 64 | Financial service activities, except insurance and pension funding                                       | 767.09   | 817   | 1.07 (0.99-1.14) | 692.90   | 672   | 0.97 (0.90-1.05) | 135.39 | 145 | 1.07 (0.90-1.26) |

|    |                                                                                            |          |       |                  |          |       |                  |        |     |                  |
|----|--------------------------------------------------------------------------------------------|----------|-------|------------------|----------|-------|------------------|--------|-----|------------------|
| 65 | Insurance and pension funding                                                              | 96.92    | 104   | 1.07 (0.88-1.32) | 87.79    | 73    | 0.83 (0.65-1.05) | 17.76  | 31  | 1.75 (1.19-2.48) |
| 66 | Activities auxiliary to financial service and insurance activities                         | 44.29    | 43    | 0.97 (0.72-1.33) | 37.22    | 30    | 0.81 (0.54-1.15) | 8.81   | 13  | 1.48 (0.79-2.52) |
| 68 | Real estate activities                                                                     | 1,864.00 | 1,837 | 0.99 (0.94-1.03) | 1,579.60 | 1,588 | 1.01 (0.96-1.06) | 259.97 | 249 | 0.96 (0.84-1.08) |
| 70 | Research and development                                                                   | 17.28    | 17    | 0.98 (0.62-1.68) | 15.57    | 15    | 0.96 (0.54-1.59) | 2.81   | 2   | 0.71 (0.09-2.57) |
| 71 | Professional services                                                                      | 410.43   | 340   | 0.83 (0.75-0.91) | 332.62   | 270   | 0.81 (0.72-0.91) | 89.69  | 70  | 0.78 (0.61-0.99) |
| 72 | Architectural, engineering and other scientific technical services                         | 359.33   | 363   | 1.01 (0.91-1.12) | 366.25   | 334   | 0.91 (0.82-1.02) | 29.53  | 29  | 0.98 (0.66-1.41) |
| 73 | Other professional, scientific and technical services                                      | 43.65    | 37    | 0.85 (0.63-1.17) | 35.85    | 31    | 0.86 (0.59-1.23) | 8.15   | 6   | 0.74 (0.27-1.60) |
| 74 | Business facilities management and landscape services                                      | 562.40   | 491   | 0.87 (0.80-0.95) | 359.50   | 393   | 1.09 (0.99-1.21) | 116.54 | 98  | 0.84 (0.68-1.02) |
| 75 | Business support services                                                                  | 1,368.34 | 1,284 | 0.94 (0.89-0.99) | 977.07   | 1,018 | 1.04 (0.98-1.11) | 288.74 | 266 | 0.92 (0.81-1.04) |
| 76 | Rental and leasing activities; except real estate                                          | 63.22    | 65    | 1.03 (0.80-1.34) | 59.78    | 59    | 0.99 (0.75-1.27) | 7.35   | 6   | 0.82 (0.30-1.78) |
| 84 | Public administration and defence; compulsory social security                              | 251.97   | 271   | 1.08 (0.95-1.21) | 210.56   | 229   | 1.09 (0.95-1.24) | 43.12  | 42  | 0.97 (0.70-1.32) |
| 85 | Education                                                                                  | 863.67   | 649   | 0.75 (0.70-0.80) | 269.94   | 249   | 0.92 (0.81-1.04) | 408.60 | 400 | 0.98 (0.89-1.08) |
| 86 | Human health activities                                                                    | 943.98   | 741   | 0.78 (0.74-0.84) | 480.39   | 393   | 0.82 (0.74-0.90) | 340.55 | 348 | 1.02 (0.92-1.14) |
| 87 | Social work activities                                                                     | 652.30   | 455   | 0.70 (0.65-0.75) | 194.28   | 185   | 0.95 (0.82-1.10) | 270.98 | 270 | 1.00 (0.88-1.12) |
| 90 | Creative, arts and recreation related services                                             | 27.24    | 25    | 0.92 (0.63-1.39) | 19.53    | 17    | 0.87 (0.51-1.39) | 6.45   | 8   | 1.24 (0.54-2.44) |
| 91 | Sports activities and amusement activities                                                 | 389.16   | 376   | 0.97 (0.87-1.07) | 295.45   | 297   | 1.01 (0.89-1.13) | 71.74  | 79  | 1.10 (0.87-1.37) |
| 94 | Membership organizations                                                                   | 732.76   | 653   | 0.89 (0.83-0.96) | 565.04   | 513   | 0.91 (0.83-0.99) | 136.95 | 140 | 1.02 (0.86-1.21) |
| 95 | Maintenance and repair services of personal and household goods                            | 166.44   | 190   | 1.14 (0.98-1.32) | 163.75   | 175   | 1.07 (0.92-1.24) | 16.01  | 15  | 0.94 (0.52-1.55) |
| 96 | Other personal services activities                                                         | 627.27   | 610   | 0.97 (0.90-1.05) | 444.31   | 474   | 1.07 (0.97-1.17) | 136.38 | 136 | 1.00 (0.84-1.18) |
| 98 | Undifferentiated goods-and services-producing activities of private households for own use | 207.30   | 208   | 1.00 (0.87-1.15) | 179.40   | 176   | 0.98 (0.84-1.14) | 28.60  | 32  | 1.12 (0.77-1.58) |
| 99 | Activities of extraterritorial organizations and bodies                                    | 68.05    | 71    | 1.04 (0.81-1.32) | 62.29    | 61    | 0.98 (0.75-1.26) | 8.06   | 10  | 1.24 (0.60-2.28) |
|    | Non-confirmed                                                                              | 4,935.20 | 5,079 | 1.03 (1.00-1.06) | 4,200.30 | 4,184 | 1.00 (0.97-1.03) | 850.09 | 895 | 1.05 (0.98-1.12) |

**Supplementary Table S5.** Age-standardized incidence ratio (SIR) and 95% confidence interval (CI) of malignant neoplasm of colon according to divisions of the Korean Standard Industrial Classification (KSIC).

| KSIC      |                                                                                                | Total workers  |                |                   | Male workers   |                |                   | Female workers |                |                    |
|-----------|------------------------------------------------------------------------------------------------|----------------|----------------|-------------------|----------------|----------------|-------------------|----------------|----------------|--------------------|
| Divisions | Description                                                                                    | Expected cases | Observed cases | SIR (95% CI)      | Expected cases | Observed cases | SIR (95% CI)      | Expected cases | Observed cases | SIR (95% CI)       |
| 01        | Agriculture                                                                                    | 27.06          | 32             | 1.18 (0.81-1.79)  | 21.36          | 24             | 1.12 (0.72-1.67)  | 5.51           | 8              | 1.45 (0.63-2.86)   |
| 02        | Forestry                                                                                       | 6.48           | 8              | 1.23 (0.58-3.21)  | 6.30           | 8              | 1.27 (0.55-2.50)  | 0.63           | 0              | 0.00 (0.00-0.00)   |
| 03        | Fishing and aquaculture                                                                        | 17.71          | 23             | 1.30 (0.82-2.20)  | 14.63          | 18             | 1.23 (0.73-1.94)  | 3.50           | 5              | 1.43 (0.46-3.33)   |
| 05        | Mining of coal, crude petroleum and natural gas                                                | 25.42          | 33             | 1.30 (0.88-2.00)  | 24.71          | 29             | 1.17 (0.79-1.69)  | 2.23           | 4              | 1.80 (0.49-4.60)   |
| 06        | Mining of metal ores                                                                           | 2.23           | 3              | 1.35 (0.40-9.46)  | 2.14           | 3              | 1.40 (0.29-4.10)  | 0.21           | 0              | 0.00 (0.00-0.00)   |
| 07        | Mining of non-metallic minerals, except fuel                                                   | 8.94           | 13             | 1.45 (0.76-3.19)  | 8.91           | 11             | 1.23 (0.62-2.21)  | 0.66           | 2              | 3.02 (0.37-10.91)  |
| 08        | Mining support service activities                                                              | 2.49           | 3              | 1.21 (0.38-7.30)  | 2.29           | 2              | 0.87 (0.11-3.16)  | 0.31           | 1              | 3.26 (0.08-18.15)  |
| 10        | Manufacture of food products                                                                   | 186.76         | 172            | 0.92 (0.80-1.07)  | 99.69          | 97             | 0.97 (0.79-1.19)  | 69.48          | 75             | 1.08 (0.85-1.35)   |
| 11        | Manufacture of beverages                                                                       | 7.89           | 5              | 0.63 (0.32-1.48)  | 6.54           | 4              | 0.61 (0.17-1.56)  | 1.37           | 1              | 0.73 (0.02-4.06)   |
| 12        | Manufacture of tobacco products                                                                | 0.57           | 2              | 3.48 (0.42-12.59) | 0.49           | 1              | 2.06 (0.05-11.49) | 0.09           | 1              | 10.75 (0.27-59.91) |
| 13        | Manufacture of textiles, except apparel                                                        | 169.00         | 149            | 0.88 (0.76-1.03)  | 114.93         | 95             | 0.83 (0.67-1.01)  | 47.81          | 54             | 1.13 (0.85-1.47)   |
| 14        | Manufacture of wearing apparel, clothing accessories and fur articles                          | 45.56          | 28             | 0.61 (0.46-0.84)  | 22.59          | 14             | 0.62 (0.34-1.04)  | 18.55          | 14             | 0.75 (0.41-1.27)   |
| 15        | Manufacture of leather, luggage and footwear                                                   | 31.35          | 35             | 1.12 (0.79-1.64)  | 20.81          | 27             | 1.30 (0.85-1.89)  | 9.09           | 8              | 0.88 (0.38-1.73)   |
| 16        | Manufacture of wood and of products of wood and cork; except furniture                         | 48.02          | 40             | 0.83 (0.63-1.13)  | 42.24          | 34             | 0.80 (0.56-1.12)  | 7.13           | 6              | 0.84 (0.31-1.83)   |
| 17        | Manufacture of pulp, paper and paper products                                                  | 51.06          | 65             | 1.27 (0.97-1.71)  | 44.79          | 56             | 1.25 (0.94-1.62)  | 7.49           | 9              | 1.20 (0.55-2.28)   |
| 18        | Printing and reproduction of recorded media                                                    | 106.98         | 92             | 0.86 (0.71-1.05)  | 84.53          | 74             | 0.88 (0.69-1.10)  | 23.48          | 18             | 0.77 (0.45-1.21)   |
| 19        | Manufacture of coke, briquettes and refined petroleum products                                 | 12.37          | 15             | 1.21 (0.70-2.32)  | 12.65          | 14             | 1.11 (0.61-1.86)  | 0.53           | 1              | 1.89 (0.05-10.51)  |
| 20        | Manufacture of chemicals and chemical products; except pharmaceuticals and medicinal chemicals | 174.06         | 160            | 0.92 (0.79-1.07)  | 151.62         | 126            | 0.83 (0.69-0.99)  | 26.32          | 34             | 1.29 (0.89-1.81)   |
| 21        | Manufacture of pharmaceuticals, medicinal chemical and botanical products                      | 12.28          | 11             | 0.90 (0.52-1.72)  | 9.38           | 8              | 0.85 (0.37-1.68)  | 2.8            | 3              | 1.07 (0.22-3.13)   |
| 22        | Manufacture of rubber and plastics products                                                    | 66.72          | 65             | 0.97 (0.77-1.26)  | 53.67          | 47             | 0.88 (0.64-1.16)  | 13.29          | 18             | 1.35 (0.80-2.14)   |
| 23        | Manufacture of other non-metallic mineral products                                             | 77.11          | 71             | 0.92 (0.74-1.17)  | 70.50          | 60             | 0.85 (0.65-1.10)  | 9.49           | 11             | 1.16 (0.58-2.07)   |
| 24        | Manufacture of basic metals                                                                    | 177.28         | 189            | 1.07 (0.92-1.24)  | 171.59         | 170            | 0.99 (0.85-1.15)  | 15.48          | 19             | 1.23 (0.74-1.92)   |
| 25        | Manufacture of fabricated metal products, except machinery and furniture                       | 162.95         | 162            | 0.99 (0.85-1.17)  | 146.18         | 144            | 0.99 (0.83-1.16)  | 22.13          | 18             | 0.81 (0.48-1.29)   |
| 26        | Manufacture of electronic components, computer; visual, sounding and communication equipment   | 214.16         | 211            | 0.99 (0.86-1.13)  | 153.87         | 153            | 0.99 (0.84-1.16)  | 57.39          | 58             | 1.01 (0.77-1.31)   |

|    |                                                                                                          |          |       |                  |        |     |                  |        |     |                   |
|----|----------------------------------------------------------------------------------------------------------|----------|-------|------------------|--------|-----|------------------|--------|-----|-------------------|
| 27 | Manufacture of medical, precision and optical instruments, watches and clocks                            | 23.07    | 24    | 1.04 (0.69-1.64) | 17.44  | 15  | 0.86 (0.48-1.42) | 5.52   | 9   | 1.63 (0.75-3.09)  |
| 28 | Manufacture of electrical equipment                                                                      | 98.63    | 91    | 0.92 (0.76-1.14) | 83.43  | 77  | 0.92 (0.73-1.15) | 17.11  | 14  | 0.82 (0.45-1.37)  |
| 29 | Manufacture of other machinery and equipment                                                             | 220.40   | 222   | 1.01 (0.88-1.15) | 201.12 | 200 | 0.99 (0.86-1.14) | 27.64  | 22  | 0.80 (0.50-1.21)  |
| 30 | Manufacture of motor vehicles, trailers and semitrailers                                                 | 322.18   | 305   | 0.95 (0.85-1.06) | 280.54 | 256 | 0.91 (0.80-1.03) | 47.65  | 49  | 1.03 (0.76-1.36)  |
| 31 | Manufacture of other transport equipment                                                                 | 177.61   | 181   | 1.02 (0.88-1.19) | 117.01 | 161 | 0.91 (0.77-1.06) | 12.26  | 20  | 1.63 (1.00-2.52)  |
| 32 | Manufacture of furniture                                                                                 | 33.75    | 22    | 0.65 (0.47-0.94) | 28.06  | 20  | 0.71 (0.44-1.10) | 6.01   | 2   | 0.33 (0.04-1.20)  |
| 33 | Other manufacturing                                                                                      | 1,137.55 | 1,056 | 0.93 (0.88-0.98) | 941.57 | 866 | 0.92 (0.86-0.98) | 206.63 | 190 | 0.92 (0.79-1.06)  |
| 35 | Electricity, gas, steam and air conditioning supply                                                      | 114.53   | 111   | 0.97 (0.81-1.17) | 116.43 | 107 | 0.92 (0.75-1.11) | 6.48   | 4   | 0.62 (0.17-1.58)  |
| 36 | Water supply                                                                                             | 7.57     | 7     | 0.92 (0.46-2.20) | 7.57   | 6   | 0.79 (0.29-1.73) | 0.51   | 1   | 1.95 (0.05-10.86) |
| 37 | Sewage, wastewater, human and animal waste treatment services                                            | 6.69     | 4     | 0.60 (0.29-1.53) | 5.44   | 4   | 0.74 (0.20-1.88) | 1.20   | 0   | 0.00 (0.00-0.00)  |
| 38 | Waste collection, treatment and disposal activities; materials recovery                                  | 36.54    | 47    | 1.29 (0.93-1.83) | 32.86  | 43  | 1.31 (0.95-1.76) | 4.86   | 4   | 0.82 (0.22-2.11)  |
| 41 | General construction                                                                                     | 635.30   | 683   | 1.08 (0.99-1.16) | 617.40 | 620 | 1.00 (0.93-1.09) | 54.10  | 63  | 1.16 (0.89-1.49)  |
| 42 | Specialized construction activities                                                                      | 386.62   | 411   | 1.06 (0.96-1.18) | 372.66 | 367 | 0.98 (0.89-1.09) | 35.90  | 44  | 1.23 (0.89-1.65)  |
| 45 | Sale of motor vehicles and parts                                                                         | 46.83    | 54    | 1.15 (0.87-1.57) | 42.65  | 47  | 1.10 (0.81-1.47) | 5.89   | 7   | 1.19 (0.48-2.45)  |
| 46 | Wholesale trade on own account or on a fee or contract basis                                             | 605.67   | 553   | 0.91 (0.84-0.99) | 471.04 | 428 | 0.91 (0.82-1.00) | 134.33 | 125 | 0.93 (0.77-1.11)  |
| 47 | Retail trade, except motor vehicles and motorcycles                                                      | 601.60   | 577   | 0.96 (0.89-1.04) | 438.80 | 424 | 0.97 (0.88-1.06) | 155.04 | 153 | 0.99 (0.84-1.16)  |
| 49 | Land transport and transport via pipelines                                                               | 186.71   | 231   | 1.24 (1.07-1.44) | 190.99 | 225 | 1.18 (1.03-1.34) | 10.48  | 6   | 0.57 (0.21-1.25)  |
| 50 | Water transport                                                                                          | 56.74    | 69    | 1.22 (0.94-1.61) | 60.44  | 68  | 1.13 (0.87-1.43) | 1.96   | 1   | 0.51 (0.01-2.84)  |
| 51 | Air transport                                                                                            | 6.51     | 12    | 1.84 (0.87-4.78) | 6.27   | 10  | 1.60 (0.77-2.93) | 0.63   | 2   | 3.18 (0.39-11.50) |
| 52 | Warehousing and support activities for transportation                                                    | 729.71   | 908   | 1.24 (1.16-1.34) | 762.44 | 880 | 1.15 (1.08-1.23) | 32.08  | 28  | 0.87 (0.58-1.26)  |
| 55 | Accommodation                                                                                            | 69.76    | 67    | 0.96 (0.76-1.23) | 37.10  | 45  | 1.21 (0.88-1.62) | 25.48  | 22  | 0.86 (0.54-1.31)  |
| 56 | Food and beverage service activities                                                                     | 266.06   | 178   | 0.67 (0.59-0.76) | 80.25  | 66  | 0.81 (0.67-0.97) | 138.43 | 112 | 0.82 (0.64-1.05)  |
| 59 | Motion picture, video and television program production, sound recording and music publishing activities | 8.37     | 8     | 0.96 (0.41-1.88) | 7.32   | 6   | 0.82 (0.30-1.78) | 1.31   | 2   | 1.53 (0.18-5.51)  |
| 60 | Broadcasting activities                                                                                  | 6.33     | 7     | 1.11 (0.52-2.91) | 3.78   | 3   | 0.79 (0.16-2.32) | 2.37   | 4   | 1.69 (0.46-4.32)  |
| 61 | Postal activities and telecommunications                                                                 | 82.61    | 70    | 0.85 (0.68-1.06) | 78.70  | 59  | 0.75 (0.57-0.97) | 8.24   | 11  | 1.34 (0.67-2.39)  |
| 62 | Computer programming, consultancy and related activities                                                 | 48.01    | 43    | 0.90 (0.68-1.21) | 41.43  | 36  | 0.87 (0.61-1.20) | 7.76   | 7   | 0.90 (0.36-1.86)  |
| 63 | Information service activities                                                                           | 72.28    | 69    | 0.95 (0.76-1.22) | 61.26  | 61  | 1.00 (0.76-1.28) | 12.54  | 8   | 0.64 (0.28-1.26)  |
| 64 | Financial service activities, except insurance and pension funding                                       | 307.74   | 253   | 0.82 (0.72-0.93) | 263.94 | 200 | 0.76 (0.66-0.87) | 56.62  | 53  | 0.94 (0.70-1.22)  |

|    |                                                                                            |          |       |                  |          |       |                  |        |     |                  |
|----|--------------------------------------------------------------------------------------------|----------|-------|------------------|----------|-------|------------------|--------|-----|------------------|
| 65 | Insurance and pension funding                                                              | 38.07    | 41    | 1.08 (0.78-1.52) | 32.71    | 32    | 0.98 (0.67-1.38) | 7.07   | 9   | 1.27 (0.58-2.42) |
| 66 | Activities auxiliary to financial service and insurance activities                         | 17.79    | 10    | 0.56 (0.27-1.03) | 14.15    | 9     | 0.64 (0.29-1.21) | 3.90   | 1   | 0.26 (0.01-1.43) |
| 68 | Real estate activities                                                                     | 860.30   | 909   | 1.06 (0.99-1.13) | 689.70   | 749   | 1.09 (1.01-1.17) | 162.85 | 160 | 0.98 (0.84-1.15) |
| 70 | Research and development                                                                   | 7.03     | 9     | 1.28 (0.62-3.17) | 6.05     | 8     | 1.32 (0.57-2.61) | 1.22   | 1   | 0.82 (0.02-4.57) |
| 71 | Professional services                                                                      | 172.13   | 187   | 1.09 (0.94-1.27) | 134.99   | 143   | 1.06 (0.89-1.25) | 40.68  | 44  | 1.08 (0.79-1.45) |
| 72 | Architectural, engineering and other scientific technical services                         | 155.32   | 183   | 1.18 (1.01-1.36) | 150.40   | 167   | 1.11 (0.95-1.29) | 14.50  | 16  | 1.10 (0.63-1.79) |
| 73 | Other professional, scientific and technical services                                      | 17.98    | 24    | 1.33 (0.84-2.25) | 14.11    | 19    | 1.35 (0.81-2.10) | 3.92   | 5   | 1.27 (0.41-2.97) |
| 74 | Business facilities management and landscape services                                      | 265.20   | 258   | 0.97 (0.86-1.10) | 160.79   | 163   | 1.01 (0.86-1.18) | 78.90  | 95  | 1.20 (0.97-1.47) |
| 75 | Business support services                                                                  | 614.39   | 636   | 1.04 (0.96-1.12) | 421.43   | 441   | 1.05 (0.95-1.15) | 167.71 | 195 | 1.16 (1.01-1.34) |
| 76 | Rental and leasing activities; except real estate                                          | 26.78    | 24    | 0.90 (0.61-1.36) | 24.10    | 22    | 0.91 (0.57-1.38) | 3.69   | 2   | 0.54 (0.07-1.96) |
| 84 | Public administration and defence; compulsory social security                              | 109.74   | 123   | 1.12 (0.93-1.36) | 87.20    | 101   | 1.16 (0.94-1.41) | 23.49  | 22  | 0.94 (0.59-1.42) |
| 85 | Education                                                                                  | 353.94   | 309   | 0.87 (0.79-0.97) | 111.47   | 98    | 0.88 (0.71-1.07) | 203.41 | 211 | 1.04 (0.90-1.19) |
| 86 | Human health activities                                                                    | 396.60   | 343   | 0.86 (0.78-0.96) | 193.21   | 197   | 1.02 (0.88-1.17) | 170.63 | 146 | 0.86 (0.72-1.01) |
| 87 | Social work activities                                                                     | 279.76   | 241   | 0.86 (0.77-0.97) | 79.55    | 91    | 1.14 (0.92-1.40) | 153.72 | 150 | 0.98 (0.83-1.15) |
| 90 | Creative, arts and recreation related services                                             | 11.50    | 9     | 0.78 (0.44-1.54) | 7.89     | 6     | 0.76 (0.28-1.65) | 3.26   | 3   | 0.92 (0.19-2.69) |
| 91 | Sports activities and amusement activities                                                 | 175.41   | 190   | 1.08 (0.93-1.26) | 126.84   | 136   | 1.07 (0.90-1.27) | 42.72  | 54  | 1.26 (0.95-1.65) |
| 94 | Membership organizations                                                                   | 323.62   | 300   | 0.93 (0.83-1.04) | 235.81   | 228   | 0.97 (0.85-1.10) | 79.12  | 72  | 0.91 (0.71-1.15) |
| 95 | Maintenance and repair services of personal and household goods                            | 66.14    | 62    | 0.91 (0.70-1.17) | 63.57    | 58    | 0.91 (0.69-1.18) | 7.61   | 4   | 0.53 (0.14-1.35) |
| 96 | Other personal services activities                                                         | 276.21   | 265   | 0.96 (0.85-1.08) | 187.34   | 188   | 1.00 (0.87-1.16) | 77.97  | 77  | 0.99 (0.78-1.23) |
| 98 | Undifferentiated goods-and services-producing activities of private households for own use | 97.97    | 102   | 1.04 (0.85-1.26) | 81.41    | 85    | 1.04 (0.83-1.29) | 17.56  | 17  | 0.97 (0.56-1.55) |
| 99 | Activities of extraterritorial organizations and bodies                                    | 30.52    | 44    | 1.44 (1.05-1.94) | 26.19    | 38    | 1.45 (1.03-1.99) | 4.90   | 6   | 1.23 (0.45-2.67) |
|    | Non-confirmed                                                                              | 2,090.80 | 2,200 | 1.05 (1.01-1.10) | 1,682.50 | 1,748 | 1.04 (0.99-1.09) | 440.79 | 452 | 1.03 (0.93-1.13) |

**Supplementary Table S6.** Age-standardized incidence ratio (SIR) and 95% confidence interval (CI) of malignant neoplasm of rectosigmoid junction, rectum, anus and anal canal according to divisions of the Korean Standard Industrial Classification (KSIC).

| KSIC      |                                                                                                | Total workers  |                |                  | Male workers   |                |                  | Female workers |                |                   |
|-----------|------------------------------------------------------------------------------------------------|----------------|----------------|------------------|----------------|----------------|------------------|----------------|----------------|-------------------|
| Divisions | Description                                                                                    | Expected cases | Observed cases | SIR (95% CI)     | Expected cases | Observed cases | SIR (95% CI)     | Expected cases | Observed cases | SIR (95% CI)      |
| 01        | Agriculture                                                                                    | 22.41          | 17             | 0.76 (0.50-1.20) | 18.47          | 15             | 0.81 (0.45-1.34) | 3.82           | 2              | 0.52 (0.06-1.89)  |
| 02        | Forestry                                                                                       | 5.23           | 8              | 1.53 (0.67-4.56) | 5.23           | 8              | 1.53 (0.66-3.02) | 0.45           | 0              | 0.00 (0.00-0.00)  |
| 03        | Fishing and aquaculture                                                                        | 14.81          | 11             | 0.74 (0.45-1.33) | 12.55          | 9              | 0.72 (0.33-1.36) | 2.55           | 2              | 0.79 (0.10-2.84)  |
| 05        | Mining of coal, crude petroleum and natural gas                                                | 21.00          | 26             | 1.24 (0.81-2.00) | 21.30          | 23             | 1.08 (0.68-1.62) | 1.57           | 3              | 1.92 (0.40-5.60)  |
| 06        | Mining of metal ores                                                                           | 1.86           | 1              | 0.54 (0.14-5.03) | 1.86           | 1              | 0.54 (0.01-2.99) | 0.15           | 0              | 0.00 (0.00-0.00)  |
| 07        | Mining of non-metallic minerals, except fuel                                                   | 7.26           | 9              | 1.24 (0.61-3.02) | 7.51           | 8              | 1.07 (0.46-2.10) | 0.46           | 1              | 2.16 (0.05-12.01) |
| 08        | Mining support service activities                                                              | 2.03           | 1              | 0.49 (0.14-4.00) | 1.93           | 1              | 0.52 (0.01-2.88) | 0.21           | 0              | 0.00 (0.00-0.00)  |
| 10        | Manufacture of food products                                                                   | 158.09         | 146            | 0.92 (0.79-1.09) | 89.60          | 92             | 1.03 (0.83-1.26) | 48.46          | 54             | 1.11 (0.84-1.45)  |
| 11        | Manufacture of beverages                                                                       | 6.79           | 4              | 0.59 (0.28-1.49) | 5.95           | 4              | 0.67 (0.18-1.72) | 0.97           | 0              | 0.00 (0.00-0.00)  |
| 12        | Manufacture of tobacco products                                                                | 0.51           | 0              | 0.00 (0.00-0.00) | 0.45           | 0              | 0.00 (0.00-0.00) | 0.07           | 0              | 0.00 (0.00-0.00)  |
| 13        | Manufacture of textiles, except apparel                                                        | 143.18         | 119            | 0.83 (0.71-0.99) | 101.86         | 88             | 0.86 (0.69-1.06) | 33.84          | 31             | 0.92 (0.62-1.30)  |
| 14        | Manufacture of wearing apparel, clothing accessories and fur articles                          | 38.85          | 39             | 1.00 (0.73-1.41) | 20.31          | 23             | 1.13 (0.72-1.70) | 13.20          | 16             | 1.21 (0.69-1.97)  |
| 15        | Manufacture of leather, luggage and footwear                                                   | 26.32          | 28             | 1.06 (0.73-1.62) | 18.30          | 17             | 0.93 (0.54-1.49) | 6.36           | 11             | 1.73 (0.86-3.10)  |
| 16        | Manufacture of wood and of products of wood and cork; except furniture                         | 39.89          | 67             | 1.68 (1.23-2.35) | 36.52          | 63             | 1.73 (1.33-2.21) | 5.00           | 4              | 0.80 (0.22-2.05)  |
| 17        | Manufacture of pulp, paper and paper products                                                  | 43.25          | 50             | 1.16 (0.86-1.60) | 39.81          | 45             | 1.13 (0.82-1.51) | 5.28           | 5              | 0.95 (0.31-2.21)  |
| 18        | Printing and reproduction of recorded media                                                    | 93.16          | 90             | 0.97 (0.79-1.20) | 96.63          | 74             | 0.97 (0.76-1.21) | 17.55          | 16             | 0.91 (0.52-1.48)  |
| 19        | Manufacture of coke, briquettes and refined petroleum products                                 | 10.98          | 13             | 1.18 (0.66-2.37) | 11.84          | 12             | 1.01 (0.52-1.77) | 0.40           | 1              | 2.48 (0.06-13.83) |
| 20        | Manufacture of chemicals and chemical products; except pharmaceuticals and medicinal chemicals | 150.56         | 153            | 1.02 (0.87-1.20) | 137.88         | 130            | 0.94 (0.79-1.12) | 19.05          | 23             | 1.21 (0.77-1.81)  |
| 21        | Manufacture of pharmaceuticals, medicinal chemical and botanical products                      | 10.78          | 10             | 0.93 (0.52-1.87) | 8.68           | 8              | 0.92 (0.40-1.82) | 2.06           | 2              | 0.97 (0.12-3.50)  |
| 22        | Manufacture of rubber and plastics products                                                    | 56.91          | 60             | 1.05 (0.81-1.39) | 47.88          | 51             | 1.07 (0.79-1.40) | 9.46           | 9              | 0.95 (0.43-1.81)  |
| 23        | Manufacture of other non-metallic mineral products                                             | 64.96          | 72             | 1.11 (0.87-1.44) | 62.14          | 65             | 1.05 (0.81-1.33) | 6.69           | 7              | 1.05 (0.42-2.16)  |
| 24        | Manufacture of basic metals                                                                    | 150.74         | 175            | 1.16 (0.99-1.37) | 152.85         | 166            | 1.09 (0.93-1.26) | 11.04          | 9              | 0.81 (0.37-1.55)  |
| 25        | Manufacture of fabricated metal products, except machinery and furniture                       | 139.65         | 125            | 0.90 (0.76-1.06) | 131.20         | 111            | 0.85 (0.70-1.02) | 15.86          | 14             | 0.88 (0.48-1.48)  |
| 26        | Manufacture of electronic components, computer; visual, sounding and communication equipment   | 193.97         | 184            | 0.95 (0.82-1.10) | 147.30         | 150            | 1.02 (0.86-1.19) | 43.25          | 34             | 0.79 (0.54-1.10)  |



|    |                                                                                                          |        |       |                  |        |     |                  |        |     |                   |
|----|----------------------------------------------------------------------------------------------------------|--------|-------|------------------|--------|-----|------------------|--------|-----|-------------------|
| 27 | Manufacture of medical, precision and optical instruments, watches and clocks                            | 20.30  | 23    | 1.13 (0.74-1.85) | 16.08  | 18  | 1.12 (0.66-1.77) | 4.06   | 5   | 1.23 (0.40-2.88)  |
| 28 | Manufacture of electrical equipment                                                                      | 85.52  | 102   | 1.19 (0.97-1.49) | 75.73  | 85  | 1.12 (0.90-1.39) | 12.45  | 17  | 1.37 (0.80-2.19)  |
| 29 | Manufacture of other machinery and equipment                                                             | 190.17 | 177   | 0.93 (0.80-1.08) | 181.85 | 165 | 0.91 (0.77-1.06) | 20.03  | 12  | 0.60 (0.31-1.05)  |
| 30 | Manufacture of motor vehicles, trailers and semitrailers                                                 | 284.52 | 282   | 0.99 (0.88-1.11) | 262.58 | 246 | 0.94 (0.82-1.06) | 34.12  | 36  | 1.06 (0.74-1.46)  |
| 31 | Manufacture of other transport equipment                                                                 | 151.54 | 135   | 0.89 (0.76-1.05) | 158.11 | 127 | 0.80 (0.67-0.96) | 8.82   | 8   | 0.91 (0.39-1.79)  |
| 32 | Manufacture of furniture                                                                                 | 28.78  | 20    | 0.70 (0.48-1.04) | 25.12  | 17  | 0.68 (0.39-1.08) | 4.24   | 3   | 0.71 (0.15-2.07)  |
| 33 | Other manufacturing                                                                                      | 979.52 | 1,027 | 1.05 (0.98-1.12) | 851.39 | 868 | 1.02 (0.95-1.09) | 148.63 | 159 | 1.07 (0.91-1.25)  |
| 35 | Electricity, gas, steam and air conditioning supply                                                      | 98.15  | 98    | 1.00 (0.82-1.23) | 104.55 | 93  | 0.89 (0.72-1.09) | 4.82   | 5   | 1.04 (0.34-2.42)  |
| 36 | Water supply                                                                                             | 6.53   | 3     | 0.46 (0.22-1.19) | 6.84   | 3   | 0.44 (0.09-1.28) | 0.38   | 0   | 0.00 (0.00-0.00)  |
| 37 | Sewage, wastewater, human and animal waste treatment services                                            | 5.36   | 2     | 0.37 (0.16-1.10) | 4.56   | 2   | 0.44 (0.05-1.58) | 0.80   | 0   | 0.00 (0.00-0.00)  |
| 38 | Waste collection, treatment and disposal activities; materials recovery                                  | 29.81  | 36    | 1.21 (0.85-1.79) | 27.89  | 33  | 1.18 (0.81-1.66) | 3.34   | 3   | 0.90 (0.19-2.62)  |
| 41 | General construction                                                                                     | 534.50 | 579   | 1.08 (1.00-1.18) | 542.90 | 537 | 0.99 (0.91-1.08) | 38.86  | 42  | 1.08 (0.78-1.46)  |
| 42 | Specialized construction activities                                                                      | 327.44 | 341   | 1.04 (0.93-1.16) | 329.54 | 312 | 0.95 (0.84-1.06) | 26.11  | 29  | 1.11 (0.74-1.60)  |
| 45 | Sale of motor vehicles and parts                                                                         | 40.73  | 39    | 0.96 (0.71-1.34) | 38.93  | 35  | 0.90 (0.63-1.25) | 4.31   | 4   | 0.93 (0.25-2.38)  |
| 46 | Wholesale trade on own account or on a fee or contract basis                                             | 518.56 | 494   | 0.95 (0.87-1.04) | 420.23 | 402 | 0.96 (0.87-1.05) | 97.86  | 92  | 0.94 (0.76-1.15)  |
| 47 | Retail trade, except motor vehicles and motorcycles                                                      | 517.12 | 507   | 0.98 (0.90-1.07) | 392.09 | 393 | 1.00 (0.91-1.11) | 113.58 | 114 | 1.00 (0.83-1.21)  |
| 49 | Land transport and transport via pipelines                                                               | 154.88 | 173   | 1.12 (0.95-1.32) | 165.02 | 164 | 0.99 (0.85-1.16) | 7.60   | 9   | 1.18 (0.54-2.25)  |
| 50 | Water transport                                                                                          | 45.49  | 46    | 1.01 (0.76-1.38) | 50.08  | 46  | 0.92 (0.67-1.23) | 1.51   | 0   | 0.00 (0.00-0.00)  |
| 51 | Air transport                                                                                            | 5.67   | 12    | 2.12 (0.95-5.98) | 5.69   | 11  | 1.93 (0.97-3.46) | 0.50   | 1   | 2.02 (0.05-11.23) |
| 52 | Warehousing and support activities for transportation                                                    | 598.06 | 788   | 1.32 (1.22-1.43) | 649.61 | 767 | 1.18 (1.10-1.27) | 23.50  | 21  | 0.89 (0.55-1.37)  |
| 55 | Accommodation                                                                                            | 58.42  | 42    | 0.72 (0.56-0.95) | 33.07  | 30  | 0.91 (0.61-1.29) | 17.59  | 12  | 0.68 (0.35-1.19)  |
| 56 | Food and beverage service activities                                                                     | 222.09 | 154   | 0.69 (0.61-0.79) | 71.50  | 60  | 0.84 (0.64-1.08) | 95.57  | 94  | 0.98 (0.79-1.20)  |
| 59 | Motion picture, video and television program production, sound recording and music publishing activities | 7.18   | 4     | 0.53 (0.15-1.37) | 6.86   | 4   | 0.58 (0.16-1.49) | 1.03   | 0   | 0.00 (0.00-0.00)  |
| 60 | Broadcasting activities                                                                                  | 5.66   | 6     | 1.06 (0.48-3.00) | 3.47   | 1   | 0.29 (0.01-1.60) | 1.83   | 5   | 2.73 (0.89-6.37)  |
| 61 | Postal activities and telecommunications                                                                 | 73.40  | 65    | 0.89 (0.70-1.13) | 73.57  | 59  | 0.80 (0.61-1.03) | 6.18   | 6   | 0.97 (0.36-2.11)  |
| 62 | Computer programming, consultancy and related activities                                                 | 44.90  | 64    | 1.43 (1.10-1.82) | 40.94  | 55  | 1.34 (1.01-1.75) | 6.36   | 9   | 1.42 (0.65-2.69)  |
| 63 | Information service activities                                                                           | 66.99  | 74    | 1.10 (0.87-1.43) | 59.95  | 62  | 1.03 (0.79-1.33) | 10.08  | 12  | 1.19 (0.61-2.08)  |
| 64 | Financial service activities, except insurance and pension funding                                       | 274.97 | 240   | 0.87 (0.77-0.99) | 244.58 | 196 | 0.80 (0.69-0.92) | 45.09  | 44  | 0.98 (0.71-1.31)  |

|    |                                                                                            |          |       |                  |         |       |                  |        |     |                  |
|----|--------------------------------------------------------------------------------------------|----------|-------|------------------|---------|-------|------------------|--------|-----|------------------|
| 65 | Insurance and pension funding                                                              | 34.62    | 33    | 0.95 (0.68-1.37) | 30.87   | 29    | 0.94 (0.63-1.35) | 5.70   | 4   | 0.70 (0.19-1.80) |
| 66 | Activities auxiliary to financial service and insurance activities                         | 15.85    | 14    | 0.88 (0.48-1.48) | 13.17   | 13    | 0.99 (0.53-1.69) | 3.02   | 1   | 0.33 (0.01-1.84) |
| 68 | Real estate activities                                                                     | 674.50   | 714   | 1.06 (0.98-1.14) | 558.00  | 608   | 1.09 (1.00-1.18) | 109.39 | 106 | 0.97 (0.79-1.17) |
| 70 | Research and development                                                                   | 6.21     | 5     | 0.80 (0.37-2.15) | 5.55    | 5     | 0.90 (0.29-2.10) | 0.96   | 0   | 0.00 (0.00-0.00) |
| 71 | Professional services                                                                      | 147.57   | 137   | 0.93 (0.79-1.10) | 117.91  | 114   | 0.97 (0.80-1.16) | 31.31  | 23  | 0.73 (0.47-1.10) |
| 72 | Architectural, engineering and other scientific technical services                         | 129.68   | 131   | 1.01 (0.84-1.20) | 130.20  | 121   | 0.93 (0.77-1.11) | 10.77  | 10  | 0.93 (0.45-1.71) |
| 73 | Other professional, scientific and technical services                                      | 15.69    | 22    | 1.40 (0.86-2.47) | 12.88   | 13    | 1.01 (0.54-1.73) | 2.95   | 9   | 3.05 (1.40-5.79) |
| 74 | Business facilities management and landscape services                                      | 203.80   | 187   | 0.92 (0.80-1.06) | 127.12  | 130   | 1.02 (0.85-1.21) | 51.58  | 57  | 1.11 (0.84-1.43) |
| 75 | Business support services                                                                  | 495.38   | 532   | 1.07 (0.98-1.18) | 347.67  | 403   | 1.16 (1.05-1.28) | 117.08 | 129 | 1.10 (0.92-1.31) |
| 76 | Rental and leasing activities; except real estate                                          | 22.82    | 20    | 0.88 (0.58-1.38) | 21.39   | 17    | 0.79 (0.46-1.27) | 2.72   | 3   | 1.10 (0.23-3.22) |
| 84 | Public administration and defence; compulsory social security                              | 91.02    | 92    | 1.01 (0.82-1.26) | 74.43   | 72    | 0.97 (0.76-1.22) | 16.83  | 20  | 1.19 (0.73-1.84) |
| 85 | Education                                                                                  | 309.14   | 240   | 0.78 (0.69-0.87) | 95.94   | 94    | 0.98 (0.79-1.20) | 151.29 | 146 | 0.97 (0.81-1.13) |
| 86 | Human health activities                                                                    | 339.67   | 333   | 0.98 (0.88-1.09) | 169.53  | 198   | 1.17 (1.01-1.34) | 126.00 | 135 | 1.07 (0.90-1.27) |
| 87 | Social work activities                                                                     | 235.56   | 169   | 0.72 (0.63-0.82) | 69.08   | 72    | 1.04 (0.82-1.31) | 108.79 | 97  | 0.89 (0.72-1.09) |
| 90 | Creative, arts and recreation related services                                             | 9.81     | 13    | 1.33 (0.72-2.79) | 6.99    | 12    | 1.72 (0.89-3.00) | 2.41   | 1   | 0.42 (0.01-2.32) |
| 91 | Sports activities and amusement activities                                                 | 140.76   | 159   | 1.13 (0.96-1.34) | 104.92  | 119   | 1.13 (0.94-1.36) | 29.49  | 40  | 1.36 (0.97-1.85) |
| 94 | Membership organizations                                                                   | 264.63   | 246   | 0.93 (0.82-1.05) | 199.85  | 192   | 0.96 (0.83-1.11) | 55.24  | 54  | 0.98 (0.73-1.28) |
| 95 | Maintenance and repair services of personal and household goods                            | 59.73    | 50    | 0.84 (0.62-1.10) | 58.42   | 47    | 0.80 (0.59-1.07) | 5.78   | 3   | 0.52 (0.11-1.52) |
| 96 | Other personal services activities                                                         | 226.52   | 224   | 0.99 (0.87-1.13) | 157.90  | 169   | 1.07 (0.91-1.24) | 54.85  | 55  | 1.00 (0.76-1.31) |
| 98 | Undifferentiated goods-and services-producing activities of private households for own use | 75.06    | 91    | 1.21 (0.98-1.49) | 63.25   | 78    | 1.23 (0.97-1.54) | 11.91  | 13  | 1.09 (0.58-1.87) |
| 99 | Activities of extraterritorial organizations and bodies                                    | 24.64    | 19    | 0.77 (0.46-1.20) | 21.95   | 18    | 0.30 (0.01-1.66) | 3.36   | 1   | 0.82 (0.49-1.30) |
|    | Non-confirmed                                                                              | 1,780.70 | 1,711 | 0.96 (0.92-1.01) | 1,484.1 | 1,393 | 0.94 (0.89-0.99) | 322.58 | 318 | 0.99 (0.88-1.10) |

**Supplementary Table S7.** Age-standardized incidence ratio (SIR) and 95% confidence interval (CI) of malignant neoplasm of liver and intrahepatic bile ducts according to divisions of the Korean Standard Industrial Classification (KSIC).

| KSIC      |                                                                                                | Total workers  |                |                    | Male workers   |                |                  | Female workers |                |                   |
|-----------|------------------------------------------------------------------------------------------------|----------------|----------------|--------------------|----------------|----------------|------------------|----------------|----------------|-------------------|
| Divisions | Description                                                                                    | Expected cases | Observed cases | SIR (95% CI)       | Expected cases | Observed cases | SIR (95% CI)     | Expected cases | Observed cases | SIR (95% CI)      |
| 01        | Agriculture                                                                                    | 34.42          | 31             | 0.90 (0.65-1.30)   | 31.53          | 29             | 0.92 (0.62-1.32) | 2.66           | 2              | 0.75 (0.09-2.72)  |
| 02        | Forestry                                                                                       | 7.99           | 22             | 2.75 (1.40-6.38)   | 8.81           | 21             | 2.38 (1.48-3.64) | 0.28           | 1              | 3.53 (0.09-19.69) |
| 03        | Fishing and aquaculture                                                                        | 23.11          | 37             | 1.60 (1.07-2.52)   | 21.70          | 34             | 1.57 (1.09-2.19) | 1.55           | 3              | 1.94 (0.40-5.67)  |
| 05        | Mining of coal, crude petroleum and natural gas                                                | 33.19          | 51             | 1.54 (1.10-2.23)   | 37.78          | 50             | 1.32 (0.98-1.74) | 1.06           | 1              | 0.94 (0.02-5.25)  |
| 06        | Mining of metal ores                                                                           | 2.90           | 5              | 1.72 (0.58-8.66)   | 3.26           | 5              | 1.53 (0.50-3.58) | 0.10           | 0              | 0.00 (0.00-0.00)  |
| 07        | Mining of non-metallic minerals, except fuel                                                   | 11.28          | 13             | 1.15 (0.65-2.28)   | 12.96          | 13             | 1.00 (0.53-1.72) | 0.32           | 0              | 0.00 (0.00-0.00)  |
| 08        | Mining support service activities                                                              | 3.17           | 6              | 1.89 (0.66-8.63)   | 3.37           | 6              | 1.78 (0.65-3.88) | 0.15           | 0              | 0.00 (0.00-0.00)  |
| 10        | Manufacture of food products                                                                   | 245.73         | 178            | 0.72 (0.64-0.82)   | 154.48         | 145            | 0.94 (0.79-1.10) | 32.99          | 33             | 1.00 (0.69-1.40)  |
| 11        | Manufacture of beverages                                                                       | 10.37          | 6              | 0.58 (0.32-1.19)   | 10.37          | 6              | 0.58 (0.21-1.26) | 0.64           | 0              | 0.00 (0.00-0.00)  |
| 12        | Manufacture of tobacco products                                                                | 0.74           | 1              | 1.35 (0.20-160.20) | 0.75           | 1              | 1.34 (0.03-7.45) | 0.04           | 0              | 0.00 (0.00-0.00)  |
| 13        | Manufacture of textiles, except apparel                                                        | 223.35         | 213            | 0.95 (0.84-1.09)   | 178.92         | 188            | 1.05 (0.91-1.21) | 22.17          | 25             | 1.13 (0.73-1.66)  |
| 14        | Manufacture of wearing apparel, clothing accessories and fur articles                          | 60.04          | 39             | 0.65 (0.50-0.85)   | 35.52          | 33             | 0.93 (0.64-1.30) | 8.58           | 6              | 0.70 (0.26-1.52)  |
| 15        | Manufacture of leather, luggage and footwear                                                   | 41.34          | 40             | 0.97 (0.71-1.35)   | 32.30          | 32             | 0.99 (0.68-1.40) | 4.27           | 8              | 1.87 (0.81-3.68)  |
| 16        | Manufacture of wood and of products of wood and cork; except furniture                         | 61.79          | 77             | 1.25 (0.97-1.63)   | 63.13          | 73             | 1.16 (0.91-1.45) | 3.36           | 4              | 1.19 (0.32-3.05)  |
| 17        | Manufacture of pulp, paper and paper products                                                  | 67.24          | 81             | 1.20 (0.95-1.55)   | 69.96          | 78             | 1.11 (0.88-1.39) | 3.51           | 3              | 0.85 (0.18-2.50)  |
| 18        | Printing and reproduction of recorded media                                                    | 140.67         | 144            | 1.02 (0.87-1.22)   | 133.60         | 133            | 1.00 (0.83-1.18) | 10.02          | 11             | 1.10 (0.55-1.96)  |
| 19        | Manufacture of coke, briquettes and refined petroleum products                                 | 17.23          | 17             | 0.99 (0.62-1.69)   | 21.59          | 17             | 0.79 (0.46-1.26) | 0.23           | 0              | 0.00 (0.00-0.00)  |
| 20        | Manufacture of chemicals and chemical products; except pharmaceuticals and medicinal chemicals | 229.07         | 201            | 0.88 (0.77-1.00)   | 239.27         | 189            | 0.79 (0.68-0.91) | 11.98          | 12             | 1.00 (0.52-1.75)  |
| 21        | Manufacture of pharmaceuticals, medicinal chemical and botanical products                      | 15.96          | 10             | 0.63 (0.39-1.10)   | 14.75          | 9              | 0.61 (0.28-1.16) | 1.24           | 1              | 0.81 (0.02-4.49)  |
| 22        | Manufacture of rubber and plastics products                                                    | 87.76          | 98             | 1.12 (0.91-1.39)   | 82.94          | 92             | 1.11 (0.89-1.36) | 6.12           | 6              | 0.98 (0.36-2.13)  |
| 23        | Manufacture of other non-metallic mineral products                                             | 100.29         | 101            | 1.01 (0.83-1.24)   | 108.02         | 96             | 0.89 (0.72-1.09) | 4.44           | 5              | 1.13 (0.37-2.63)  |
| 24        | Manufacture of basic metals                                                                    | 235.02         | 284            | 1.21 (1.06-1.38)   | 269.70         | 275            | 1.02 (0.90-1.15) | 7.12           | 9              | 1.26 (0.58-2.40)  |
| 25        | Manufacture of fabricated metal products, except machinery and furniture                       | 215.31         | 256            | 1.19 (1.04-1.37)   | 228.71         | 246            | 1.08 (0.95-1.22) | 10.08          | 10             | 0.99 (0.48-1.82)  |
| 26        | Manufacture of electronic components, computer; visual, sounding and communication equipment   | 282.63         | 209            | 0.74 (0.66-0.83)   | 245.22         | 189            | 0.77 (0.66-0.89) | 24.41          | 20             | 0.82 (0.50-1.27)  |

|    |                                                                                                          |          |       |                  |          |       |                  |       |    |                  |
|----|----------------------------------------------------------------------------------------------------------|----------|-------|------------------|----------|-------|------------------|-------|----|------------------|
| 27 | Manufacture of medical, precision and optical instruments, watches and clocks                            | 30.54    | 25    | 0.82 (0.58-1.21) | 27.45    | 23    | 0.84 (0.53-1.26) | 2.41  | 2  | 0.83 (0.10-3.00) |
| 28 | Manufacture of electrical equipment                                                                      | 130.49   | 131   | 1.00 (0.85-1.20) | 131.03   | 122   | 0.93 (0.77-1.11) | 7.62  | 9  | 1.18 (0.54-2.24) |
| 29 | Manufacture of other machinery and equipment                                                             | 291.70   | 346   | 1.19 (1.06-1.33) | 317.20   | 333   | 1.05 (0.94-1.17) | 12.39 | 13 | 1.05 (0.56-1.79) |
| 30 | Manufacture of motor vehicles, trailers and semitrailers                                                 | 441.85   | 378   | 0.86 (0.78-0.94) | 469.27   | 358   | 0.77 (0.69-0.85) | 21.61 | 20 | 0.93 (0.57-1.43) |
| 31 | Manufacture of other transport equipment                                                                 | 235.76   | 282   | 1.20 (1.05-1.36) | 278.14   | 277   | 1.00 (0.88-1.12) | 5.55  | 5  | 0.90 (0.29-2.10) |
| 32 | Manufacture of furniture                                                                                 | 44.61    | 48    | 1.08 (0.80-1.48) | 43.97    | 46    | 1.05 (0.77-1.40) | 2.79  | 2  | 0.72 (0.09-2.59) |
| 33 | Other manufacturing                                                                                      | 1,489.90 | 1,498 | 1.01 (0.96-1.06) | 1,468.58 | 1,413 | 0.96 (0.91-1.01) | 94.24 | 85 | 0.90 (0.72-1.12) |
| 35 | Electricity, gas, steam and air conditioning supply                                                      | 154.12   | 188   | 1.22 (1.04-1.44) | 186.75   | 185   | 0.99 (0.85-1.14) | 2.72  | 3  | 1.10 (0.23-3.22) |
| 36 | Water supply                                                                                             | 10.41    | 11    | 1.06 (0.58-2.17) | 12.48    | 11    | 0.88 (0.44-1.58) | 0.22  | 0  | 0.00 (0.00-0.00) |
| 37 | Sewage, wastewater, human and animal waste treatment services                                            | 8.18     | 13    | 1.59 (0.81-3.64) | 7.73     | 12    | 1.55 (0.80-2.71) | 0.62  | 1  | 1.61 (0.04-8.94) |
| 38 | Waste collection, treatment and disposal activities; materials recovery                                  | 45.87    | 62    | 1.35 (1.01-1.85) | 47.68    | 58    | 1.22 (0.92-1.57) | 2.38  | 4  | 1.68 (0.46-4.31) |
| 41 | General construction                                                                                     | 817.70   | 1087  | 1.33 (1.24-1.43) | 941.90   | 1,052 | 1.12 (1.05-1.19) | 24.83 | 35 | 1.41 (0.98-1.96) |
| 42 | Specialized construction activities                                                                      | 504.80   | 755   | 1.50 (1.37-1.64) | 576.28   | 740   | 1.28 (1.19-1.38) | 15.95 | 15 | 0.94 (0.53-1.55) |
| 45 | Sale of motor vehicles and parts                                                                         | 61.22    | 83    | 1.36 (1.06-1.77) | 68.89    | 78    | 1.17 (0.92-1.46) | 2.59  | 5  | 1.93 (0.63-4.51) |
| 46 | Wholesale trade on own account or on a fee or contract basis                                             | 782.93   | 792   | 1.01 (0.94-1.09) | 719.45   | 732   | 1.02 (0.95-1.09) | 60.14 | 60 | 1.00 (0.76-1.28) |
| 47 | Retail trade, except motor vehicles and motorcycles                                                      | 772.52   | 766   | 0.99 (0.92-1.07) | 662.16   | 688   | 1.04 (0.96-1.12) | 68.84 | 78 | 1.13 (0.90-1.41) |
| 49 | Land transport and transport via pipelines                                                               | 242.23   | 307   | 1.27 (1.12-1.44) | 289.65   | 301   | 1.04 (0.93-1.16) | 4.69  | 6  | 1.28 (0.47-2.78) |
| 50 | Water transport                                                                                          | 68.85    | 95    | 1.38 (1.09-1.77) | 83.96    | 95    | 1.13 (0.92-1.38) | 0.846 | 0  | 0.00 (0.00-0.00) |
| 51 | Air transport                                                                                            | 8.67     | 6     | 0.69 (0.36-1.54) | 10.07    | 6     | 0.60 (0.22-1.30) | 0.26  | 0  | 0.00 (0.00-0.00) |
| 52 | Warehousing and support activities for transportation                                                    | 939.19   | 1,290 | 1.37 (1.29-1.47) | 1,139.64 | 1,284 | 1.13 (1.07-1.19) | 14.28 | 6  | 0.42 (0.15-0.91) |
| 55 | Accommodation                                                                                            | 89.13    | 63    | 0.71 (0.57-0.88) | 55.98    | 42    | 0.75 (0.54-1.01) | 12.37 | 21 | 1.70 (1.05-2.59) |
| 56 | Food and beverage service activities                                                                     | 347.28   | 184   | 0.53 (0.48-0.59) | 121.08   | 113   | 0.93 (0.77-1.12) | 66.76 | 71 | 1.06 (0.83-1.34) |
| 59 | Motion picture, video and television program production, sound recording and music publishing activities | 10.78    | 8     | 0.74 (0.32-1.46) | 11.68    | 8     | 0.68 (0.30-1.35) | 0.53  | 0  | 0.00 (0.00-0.00) |
| 60 | Broadcasting activities                                                                                  | 7.85     | 4     | 0.51 (0.26-1.19) | 5.63     | 4     | 0.71 (0.19-1.82) | 0.96  | 0  | 0.00 (0.00-0.00) |
| 61 | Postal activities and telecommunications                                                                 | 116.76   | 135   | 1.16 (0.96-1.40) | 136.12   | 131   | 0.96 (0.80-1.14) | 3.33  | 4  | 1.20 (0.33-3.08) |
| 62 | Computer programming, consultancy and related activities                                                 | 59.90    | 57    | 0.95 (0.72-1.23) | 65.81    | 55    | 0.84 (0.63-1.09) | 2.95  | 2  | 0.68 (0.08-2.45) |
| 63 | Information service activities                                                                           | 90.35    | 91    | 1.01 (0.82-1.25) | 96.61    | 87    | 0.90 (0.72-1.11) | 4.89  | 4  | 0.82 (0.22-2.10) |
| 64 | Financial service activities, except insurance and pension funding                                       | 414.52   | 443   | 1.07 (0.97-1.17) | 439.67   | 417   | 0.95 (0.86-1.04) | 21.39 | 26 | 1.22 (0.79-1.78) |

|    |                                                                                            |          |       |                  |          |       |                  |        |     |                  |
|----|--------------------------------------------------------------------------------------------|----------|-------|------------------|----------|-------|------------------|--------|-----|------------------|
| 65 | Insurance and pension funding                                                              | 52.70    | 29    | 0.55 (0.42-0.74) | 56.86    | 27    | 0.47 (0.31-0.69) | 2.62   | 2   | 0.76 (0.09-2.76) |
| 66 | Activities auxiliary to financial service and insurance activities                         | 23.29    | 14    | 0.60 (0.33-1.01) | 23.11    | 14    | 0.61 (0.33-1.02) | 1.59   | 0   | 0.00 (0.00-0.00) |
| 68 | Real estate activities                                                                     | 1,002.10 | 1,041 | 1.04 (0.98-1.11) | 904.00   | 940   | 1.04 (0.97-1.11) | 84.53  | 101 | 1.19 (0.97-1.45) |
| 70 | Research and development                                                                   | 9.05     | 7     | 0.77 (0.41-1.69) | 9.51     | 7     | 0.74 (0.30-1.52) | 0.45   | 0   | 0.00 (0.00-0.00) |
| 71 | Professional services                                                                      | 216.39   | 198   | 0.92 (0.80-1.05) | 199.59   | 181   | 0.91 (0.78-1.05) | 16.70  | 17  | 1.02 (0.59-1.63) |
| 72 | Architectural, engineering and other scientific technical services                         | 193.61   | 215   | 1.11 (0.97-1.27) | 219.48   | 214   | 0.98 (0.85-1.11) | 6.37   | 1   | 0.16 (0.00-0.87) |
| 73 | Other professional, scientific and technical services                                      | 22.60    | 24    | 1.06 (0.71-1.68) | 21.41    | 23    | 1.07 (0.68-1.61) | 1.69   | 1   | 0.59 (0.01-3.29) |
| 74 | Business facilities management and landscape services                                      | 303.90   | 279   | 0.92 (0.82-1.03) | 201.90   | 230   | 1.14 (1.00-1.30) | 42.59  | 49  | 1.15 (0.85-1.52) |
| 75 | Business support services                                                                  | 736.84   | 683   | 0.93 (0.86-1.00) | 563.52   | 583   | 1.03 (0.95-1.12) | 81.81  | 100 | 1.22 (0.99-1.49) |
| 76 | Rental and leasing activities; except real estate                                          | 33.78    | 46    | 1.36 (0.97-1.97) | 36.05    | 44    | 1.22 (0.89-1.64) | 1.62   | 2   | 1.23 (0.15-4.45) |
| 84 | Public administration and defence; compulsory social security                              | 140.78   | 155   | 1.10 (0.93-1.31) | 128.56   | 148   | 1.15 (0.97-1.35) | 10.68  | 7   | 0.66 (0.26-1.35) |
| 85 | Education                                                                                  | 465.69   | 190   | 0.41 (0.37-0.45) | 160.86   | 138   | 0.86 (0.72-1.01) | 87.20  | 52  | 0.60 (0.45-0.78) |
| 86 | Human health activities                                                                    | 502.21   | 308   | 0.61 (0.56-0.67) | 291.93   | 229   | 0.78 (0.69-0.89) | 75.85  | 79  | 1.04 (0.82-1.30) |
| 87 | Social work activities                                                                     | 361.10   | 178   | 0.49 (0.44-0.55) | 116.45   | 108   | 0.93 (0.76-1.12) | 71.67  | 70  | 0.98 (0.76-1.23) |
| 90 | Creative, arts and recreation related services                                             | 14.07    | 8     | 0.57 (0.34-1.04) | 11.44    | 8     | 0.70 (0.30-1.38) | 1.47   | 0   | 0.00 (0.00-0.00) |
| 91 | Sports activities and amusement activities                                                 | 208.88   | 208   | 1.00 (0.87-1.15) | 170.40   | 183   | 1.07 (0.92-1.24) | 21.28  | 25  | 1.17 (0.76-1.73) |
| 94 | Membership organizations                                                                   | 400.98   | 378   | 0.94 (0.85-1.04) | 337.29   | 338   | 1.00 (0.90-1.11) | 38.28  | 40  | 1.04 (0.75-1.42) |
| 95 | Maintenance and repair services of personal and household goods                            | 88.76    | 128   | 1.44 (1.20-1.71) | 101.14   | 124   | 1.24 (1.03-1.48) | 3.24   | 4   | 1.24 (0.34-3.17) |
| 96 | Other personal services activities                                                         | 341.21   | 332   | 0.97 (0.88-1.09) | 26.16    | 299   | 1.14 (1.02-1.28) | 37.06  | 33  | 0.89 (0.61-1.25) |
| 98 | Undifferentiated goods-and services-producing activities of private households for own use | 110.60   | 134   | 1.21 (1.02-1.43) | 99.39    | 119   | 1.20 (0.99-1.43) | 8.93   | 15  | 1.68 (0.94-2.77) |
| 99 | Activities of extraterritorial organizations and bodies                                    | 38.12    | 45    | 1.18 (0.86-1.58) | 37.60    | 44    | 1.17 (0.85-1.57) | 2.40   | 1   | 0.42 (0.01-2.32) |
|    | Non-confirmed                                                                              | 2,780.00 | 2,547 | 0.92 (0.88-0.95) | 2,639.00 | 2,377 | 0.90 (0.86-0.94) | 192.44 | 170 | 0.88 (0.76-1.03) |

**Supplementary Table S8.** Age-standardized incidence ratio (SIR) and 95% confidence interval (CI) of malignant neoplasm of pancreas according to divisions of the Korean Standard Industrial Classification (KSIC).

| KSIC      |                                                                                                | Total workers  |                |                   | Male workers   |                |                  | Female workers |                |                   |
|-----------|------------------------------------------------------------------------------------------------|----------------|----------------|-------------------|----------------|----------------|------------------|----------------|----------------|-------------------|
| Divisions | Description                                                                                    | Expected cases | Observed cases | SIR (95% CI)      | Expected cases | Observed cases | SIR (95% CI)     | Expected cases | Observed cases | SIR (95% CI)      |
| 01        | Agriculture                                                                                    | 8.01           | 6              | 0.75 (0.38-1.73)  | 6.51           | 4              | 0.61 (0.17-1.57) | 1.46           | 2              | 1.37 (0.17-4.94)  |
| 02        | Forestry                                                                                       | 1.95           | 2              | 1.03 (0.28-8.83)  | 1.94           | 1              | 0.52 (0.01-2.87) | 0.15           | 1              | 6.49 (0.16-36.18) |
| 03        | Fishing and aquaculture                                                                        | 5.22           | 7              | 1.34 (0.58-4.01)  | 4.48           | 7              | 1.56 (0.63-3.22) | 0.83           | 0              | 0.00 (0.00-0.00)  |
| 05        | Mining of coal, crude petroleum and natural gas                                                | 7.56           | 11             | 1.46 (0.73-2.60)  | 7.57           | 10             | 1.32 (0.63-2.43) | 0.58           | 1              | 1.72 (0.04-9.59)  |
| 06        | Mining of metal ores                                                                           | 0.66           | 1              | 1.52 (0.04-8.44)  | 0.65           | 1              | 1.53 (0.04-8.53) | 0.06           | 0              | 0.00 (0.00-0.00)  |
| 07        | Mining of non-metallic minerals, except fuel                                                   | 2.69           | 3              | 1.12 (0.36-6.14)  | 2.75           | 3              | 1.09 (0.23-3.19) | 0.17           | 0              | 0.00 (0.00-0.00)  |
| 08        | Mining support service activities                                                              | 0.75           | 0              | 0.00 (0.00-0.00)  | 0.70           | 0              | 0.00 (0.00-0.00) | 0.08           | 0              | 0.00 (0.00-0.00)  |
| 10        | Manufacture of food products                                                                   | 54.41          | 57             | 1.05 (0.80-1.39)  | 29.98          | 33             | 1.10 (0.76-1.55) | 18.07          | 24             | 1.33 (0.85-1.98)  |
| 11        | Manufacture of beverages                                                                       | 2.27           | 4              | 1.76 (0.52-12.06) | 1.97           | 4              | 2.02 (0.55-5.21) | 0.35           | 0              | 0.00 (0.00-0.00)  |
| 12        | Manufacture of tobacco products                                                                | 0.16           | 0              | 0.00 (0.00-0.00)  | 0.14           | 0              | 0.00 (0.00-0.00) | 0.02           | 0              | 0.00 (0.00-0.00)  |
| 13        | Manufacture of textiles, except apparel                                                        | 49.31          | 35             | 0.71 (0.54-0.96)  | 34.88          | 21             | 0.60 (0.37-0.92) | 12.08          | 14             | 1.16 (0.63-1.94)  |
| 14        | Manufacture of wearing apparel, clothing accessories and fur articles                          | 13.18          | 17             | 1.29 (0.76-2.41)  | 6.81           | 10             | 1.47 (0.70-2.70) | 4.67           | 7              | 1.50 (0.60-3.09)  |
| 15        | Manufacture of leather, luggage and footwear                                                   | 9.20           | 11             | 1.20 (0.63-2.59)  | 6.32           | 9              | 1.42 (0.65-2.70) | 2.35           | 2              | 0.85 (0.10-3.08)  |
| 16        | Manufacture of wood and of products of wood and cork; except furniture                         | 14.17          | 14             | 0.99 (0.59-1.80)  | 12.87          | 12             | 0.93 (0.48-1.63) | 1.84           | 2              | 1.09 (0.13-3.93)  |
| 17        | Manufacture of pulp, paper and paper products                                                  | 14.91          | 13             | 0.87 (0.53-1.56)  | 13.59          | 11             | 0.81 (0.40-1.45) | 1.92           | 2              | 1.04 (0.13-3.76)  |
| 18        | Printing and reproduction of recorded media                                                    | 30.45          | 29             | 0.95 (0.67-1.41)  | 25.45          | 24             | 0.94 (0.60-1.40) | 5.35           | 5              | 0.93 (0.30-2.18)  |
| 19        | Manufacture of coke, briquettes and refined petroleum products                                 | 3.52           | 4              | 1.14 (0.42-4.68)  | 3.82           | 4              | 1.05 (0.29-2.68) | 0.12           | 0              | 0.00 (0.00-0.00)  |
| 20        | Manufacture of chemicals and chemical products; except pharmaceuticals and medicinal chemicals | 49.81          | 49             | 0.98 (0.75-1.33)  | 45.44          | 42             | 0.92 (0.67-1.25) | 6.45           | 7              | 1.08 (0.44-2.24)  |
| 21        | Manufacture of pharmaceuticals, medicinal chemical and botanical products                      | 3.45           | 4              | 1.16 (0.42-4.87)  | 2.78           | 4              | 1.44 (0.39-3.69) | 0.66           | 0              | 0.00 (0.00-0.00)  |
| 22        | Manufacture of rubber and plastics products                                                    | 19.35          | 25             | 1.29 (0.83-2.14)  | 16.17          | 21             | 1.30 (0.80-1.99) | 3.33           | 4              | 1.20 (0.33-3.08)  |
| 23        | Manufacture of other non-metallic mineral products                                             | 22.55          | 29             | 1.29 (0.85-2.04)  | 21.38          | 26             | 1.22 (0.79-1.78) | 2.43           | 3              | 1.24 (0.26-3.62)  |
| 24        | Manufacture of basic metals                                                                    | 51.59          | 57             | 1.10 (0.84-1.48)  | 51.95          | 53             | 1.02 (0.76-1.33) | 3.67           | 4              | 1.03 (0.28-2.65)  |
| 25        | Manufacture of fabricated metal products, except machinery and furniture                       | 47.05          | 45             | 0.96 (0.72-1.30)  | 43.99          | 40             | 0.91 (0.65-1.24) | 5.46           | 5              | 0.92 (0.30-2.14)  |

|    |                                                                                                          |        |     |                   |        |     |                  |       |    |                   |
|----|----------------------------------------------------------------------------------------------------------|--------|-----|-------------------|--------|-----|------------------|-------|----|-------------------|
| 26 | Manufacture of electronic components, computer; visual, sounding and communication equipment             | 58.59  | 42  | 0.72 (0.56-0.94)  | 44.66  | 30  | 0.67 (0.45-0.96) | 12.83 | 12 | 0.94 (0.48-1.63)  |
| 27 | Manufacture of medical, precision and optical instruments, watches and clocks                            | 6.51   | 7   | 1.08 (0.51-2.79)  | 5.18   | 4   | 0.77 (0.21-1.98) | 1.29  | 3  | 2.33 (0.48-6.81)  |
| 28 | Manufacture of electrical equipment                                                                      | 28.18  | 30  | 1.06 (0.74-1.60)  | 24.96  | 26  | 1.04 (0.68-1.53) | 4.09  | 4  | 0.98 (0.27-2.50)  |
| 29 | Manufacture of other machinery and equipment                                                             | 63.23  | 64  | 1.01 (0.79-1.32)  | 60.34  | 56  | 0.93 (0.70-1.21) | 6.68  | 8  | 1.20 (0.52-2.36)  |
| 30 | Manufacture of motor vehicles, trailers and semitrailers                                                 | 91.35  | 83  | 0.91 (0.74-1.13)  | 83.71  | 73  | 0.87 (0.68-1.10) | 11.70 | 10 | 0.85 (0.41-1.57)  |
| 31 | Manufacture of other transport equipment                                                                 | 51.48  | 59  | 1.15 (0.87-1.54)  | 53.36  | 53  | 0.99 (0.74-1.30) | 3.01  | 6  | 2.00 (0.73-4.34)  |
| 32 | Manufacture of furniture                                                                                 | 9.79   | 6   | 0.61 (0.33-1.29)  | 8.46   | 5   | 0.59 (0.19-1.38) | 1.52  | 1  | 0.66 (0.02-3.66)  |
| 33 | Other manufacturing                                                                                      | 326.47 | 347 | 1.06 (0.95-1.19)  | 282.41 | 303 | 1.07 (0.96-1.20) | 50.95 | 44 | 0.86 (0.63-1.16)  |
| 35 | Electricity, gas, steam and air conditioning supply                                                      | 33.26  | 39  | 1.17 (0.84-1.70)  | 35.35  | 39  | 1.10 (0.78-1.51) | 1.47  | 0  | 0.00 (0.00-0.00)  |
| 36 | Water supply                                                                                             | 2.19   | 5   | 2.29 (0.66-16.50) | 2.29   | 4   | 1.75 (0.48-4.48) | 0.12  | 1  | 8.40 (0.21-46.82) |
| 37 | Sewage, wastewater, human and animal waste treatment services                                            | 2.03   | 3   | 1.48 (0.41-11.97) | 1.68   | 2   | 1.19 (0.14-4.30) | 0.35  | 1  | 2.89 (0.07-16.10) |
| 38 | Waste collection, treatment and disposal activities; materials recovery                                  | 10.94  | 13  | 1.19 (0.66-2.39)  | 10.10  | 13  | 1.29 (0.69-2.20) | 1.31  | 0  | 0.00 (0.00-0.00)  |
| 41 | General construction                                                                                     | 186.12 | 197 | 1.06 (0.92-1.23)  | 187.96 | 181 | 0.96 (0.83-1.11) | 13.51 | 16 | 1.18 (0.68-1.92)  |
| 42 | Specialized construction activities                                                                      | 112.83 | 121 | 1.07 (0.89-1.30)  | 113.28 | 110 | 0.97 (0.80-1.17) | 8.64  | 11 | 1.27 (0.64-2.28)  |
| 45 | Sale of motor vehicles and parts                                                                         | 13.34  | 15  | 1.12 (0.66-2.09)  | 12.76  | 14  | 1.10 (0.60-1.84) | 1.39  | 1  | 0.72 (0.02-4.00)  |
| 46 | Wholesale trade on own account or on a fee or contract basis                                             | 174.55 | 166 | 0.95 (0.82-1.11)  | 142.06 | 131 | 0.92 (0.77-1.09) | 32.39 | 35 | 1.08 (0.75-1.50)  |
| 47 | Retail trade, except motor vehicles and motorcycles                                                      | 172.53 | 167 | 0.97 (0.83-1.13)  | 131.90 | 131 | 0.99 (0.83-1.18) | 36.92 | 36 | 0.98 (0.68-1.35)  |
| 49 | Land transport and transport via pipelines                                                               | 55.40  | 56  | 1.01 (0.78-1.34)  | 58.54  | 53  | 0.91 (0.68-1.18) | 2.54  | 3  | 1.18 (0.24-3.46)  |
| 50 | Water transport                                                                                          | 17.11  | 24  | 1.40 (0.88-2.40)  | 18.64  | 24  | 1.29 (0.82-1.92) | 0.44  | 0  | 0.00 (0.00-0.00)  |
| 51 | Air transport                                                                                            | 1.85   | 1   | 0.54 (0.14-5.06)  | 1.89   | 1   | 0.53 (0.01-2.96) | 0.13  | 0  | 0.00 (0.00-0.00)  |
| 52 | Warehousing and support activities for transportation                                                    | 218.35 | 265 | 1.21 (1.06-1.39)  | 234.68 | 259 | 1.10 (0.97-1.25) | 7.70  | 6  | 0.78 (0.29-1.70)  |
| 55 | Accommodation                                                                                            | 20.41  | 16  | 0.78 (0.51-1.28)  | 11.16  | 10  | 0.90 (0.43-1.65) | 6.81  | 6  | 0.88 (0.32-1.92)  |
| 56 | Food and beverage service activities                                                                     | 78.36  | 60  | 0.77 (0.61-0.97)  | 24.09  | 22  | 0.91 (0.57-1.38) | 36.69 | 38 | 1.04 (0.73-1.42)  |
| 59 | Motion picture, video and television program production, sound recording and music publishing activities | 2.31   | 3   | 1.30 (0.39-8.68)  | 2.17   | 3   | 1.38 (0.29-4.05) | 0.28  | 0  | 0.00 (0.00-0.00)  |
| 60 | Broadcasting activities                                                                                  | 1.73   | 2   | 1.16 (0.29-12.23) | 1.11   | 2   | 1.80 (0.22-6.51) | 0.51  | 0  | 0.00 (0.00-0.00)  |
| 61 | Postal activities and telecommunications                                                                 | 23.38  | 12  | 0.51 (0.34-0.81)  | 23.62  | 10  | 0.42 (0.20-0.78) | 1.79  | 2  | 1.12 (0.14-4.03)  |
| 62 | Computer programming, consultancy and related activities                                                 | 12.54  | 14  | 1.12 (0.61-1.87)  | 11.84  | 12  | 1.01 (0.52-1.77) | 1.49  | 2  | 1.34 (0.16-4.85)  |

|    |                                                                                            |        |     |                   |        |     |                  |        |     |                   |
|----|--------------------------------------------------------------------------------------------|--------|-----|-------------------|--------|-----|------------------|--------|-----|-------------------|
| 63 | Information service activities                                                             | 19.10  | 21  | 1.10 (0.70-1.82)  | 17.60  | 20  | 1.14 (0.69-1.75) | 2.50   | 1   | 0.40 (0.01-2.23)  |
| 64 | Financial service activities, except insurance and pension funding                         | 85.85  | 95  | 1.11 (0.90-1.35)  | 79.33  | 85  | 1.07 (0.86-1.32) | 11.16  | 10  | 0.90 (0.43-1.65)  |
| 65 | Insurance and pension funding                                                              | 10.51  | 20  | 1.90 (1.05-3.89)  | 9.79   | 17  | 1.74 (1.01-2.78) | 1.34   | 3   | 2.23 (0.46-6.53)  |
| 66 | Activities auxiliary to financial service and insurance activities                         | 4.96   | 4   | 0.81 (0.22-2.07)  | 4.24   | 4   | 0.94 (0.26-2.42) | 0.84   | 0   | 0.00 (0.00-0.00)  |
| 68 | Real estate activities                                                                     | 262.62 | 245 | 0.93 (0.82-1.06)  | 213.78 | 204 | 0.95 (0.83-1.09) | 46.71  | 41  | 0.88 (0.63-1.19)  |
| 70 | Research and development                                                                   | 1.97   | 3   | 1.52 (0.42-12.91) | 1.81   | 2   | 1.10 (0.13-3.99) | 0.26   | 1   | 3.92 (0.10-21.85) |
| 71 | Professional services                                                                      | 49.28  | 45  | 0.91 (0.69-1.23)  | 41.03  | 39  | 0.95 (0.68-1.30) | 8.79   | 6   | 0.68 (0.25-1.49)  |
| 72 | Architectural, engineering and other scientific technical services                         | 45.47  | 70  | 1.54 (1.20-1.94)  | 45.75  | 67  | 1.46 (1.13-1.86) | 3.41   | 3   | 0.88 (0.18-2.57)  |
| 73 | Other professional, scientific and technical services                                      | 5.06   | 4   | 0.79 (0.34-2.41)  | 4.20   | 3   | 0.71 (0.15-2.09) | 0.9    | 1   | 1.11 (0.03-6.19)  |
| 74 | Business facilities management and landscape services                                      | 81.92  | 78  | 0.95 (0.77-1.20)  | 50.04  | 54  | 1.08 (0.81-1.41) | 23.69  | 24  | 1.01 (0.65-1.51)  |
| 75 | Business support services                                                                  | 183.84 | 191 | 1.04 (0.90-1.21)  | 129.44 | 144 | 1.11 (0.94-1.31) | 44.62  | 47  | 1.05 (0.77-1.40)  |
| 76 | Rental and leasing activities; except real estate                                          | 7.71   | 11  | 1.43 (0.72-3.37)  | 7.25   | 10  | 1.38 (0.66-2.54) | 0.87   | 1   | 1.15 (0.03-6.38)  |
| 84 | Public administration and defence; compulsory social security                              | 32.49  | 23  | 0.71 (0.50-1.03)  | 26.77  | 21  | 0.78 (0.49-1.20) | 5.80   | 2   | 0.35 (0.04-1.25)  |
| 85 | Education                                                                                  | 100.54 | 95  | 0.94 (0.78-1.16)  | 33.92  | 36  | 1.06 (0.74-1.47) | 46.47  | 59  | 1.27 (0.97-1.64)  |
| 86 | Human health activities                                                                    | 113.59 | 103 | 0.91 (0.75-1.10)  | 54.81  | 66  | 1.12 (0.87-1.43) | 40.52  | 37  | 0.91 (0.64-1.26)  |
| 87 | Social work activities                                                                     | 81.68  | 60  | 0.73 (0.59-0.92)  | 24.19  | 25  | 1.03 (0.67-1.53) | 39.05  | 35  | 0.90 (0.62-1.25)  |
| 90 | Creative, arts and recreation related services                                             | 3.28   | 3   | 0.92 (0.33-4.05)  | 2.36   | 3   | 1.27 (0.26-3.71) | 0.78   | 0   | 0.00 (0.00-0.00)  |
| 91 | Sports activities and amusement activities                                                 | 52.66  | 48  | 0.91 (0.70-1.22)  | 38.98  | 38  | 0.97 (0.69-1.34) | 11.66  | 10  | 0.86 (0.41-1.58)  |
| 94 | Membership organizations                                                                   | 96.37  | 85  | 0.88 (0.72-1.09)  | 72.33  | 67  | 0.93 (0.72-1.18) | 20.94  | 18  | 0.86 (0.51-1.36)  |
| 95 | Maintenance and repair services of personal and household goods                            | 19.26  | 18  | 0.93 (0.55-1.48)  | 19.00  | 18  | 0.95 (0.56-1.50) | 1.71   | 0   | 0.00 (0.00-0.00)  |
| 96 | Other personal services activities                                                         | 81.90  | 74  | 0.90 (0.73-1.14)  | 57.30  | 57  | 0.99 (0.75-1.29) | 20.20  | 17  | 0.84 (0.49-1.35)  |
| 98 | Undifferentiated goods-and services-producing activities of private households for own use | 30.28  | 27  | 0.89 (0.59-1.30)  | 25.45  | 22  | 0.86 (0.54-1.31) | 4.93   | 5   | 1.02 (0.33-2.37)  |
| 99 | Activities of extraterritorial organizations and bodies                                    | 9.21   | 4   | 0.43 (0.12-1.11)  | 8.10   | 3   | 0.37 (0.08-1.08) | 1.32   | 1   | 0.76 (0.02-4.21)  |
|    | Non-confirmed                                                                              | 608.44 | 608 | 1.00 (0.92-1.08)  | 512.24 | 498 | 0.97 (0.89-1.06) | 103.73 | 110 | 1.06 (0.87-1.28)  |



**Supplementary Table S9.** Age-standardized incidence ratio (SIR) and 95% confidence interval (CI) of other malignant neoplasm of digestive organs according to divisions of the Korean Standard Industrial Classification (KSIC).

| KSIC      |                                                                                                | Total workers  |                |                   | Male workers   |                |                  | Female workers |                |                  |
|-----------|------------------------------------------------------------------------------------------------|----------------|----------------|-------------------|----------------|----------------|------------------|----------------|----------------|------------------|
| Divisions | Description                                                                                    | Expected cases | Observed cases | SIR (95% CI)      | Expected cases | Observed cases | SIR (95% CI)     | Expected cases | Observed cases | SIR (95% CI)     |
| 01        | Agriculture                                                                                    | 8.33           | 10             | 1.20 (0.62-2.72)  | 6.53           | 6              | 0.92 (0.34-2.00) | 1.77           | 4              | 2.26 (0.62-5.78) |
| 02        | Forestry                                                                                       | 2.04           | 3              | 1.47 (0.41-11.76) | 1.97           | 3              | 1.52 (0.31-4.45) | 0.19           | 0              | 0.00 (0.00-0.00) |
| 03        | Fishing and aquaculture                                                                        | 5.40           | 7              | 1.30 (0.57-3.78)  | 4.49           | 6              | 1.34 (0.49-2.91) | 1.00           | 1              | 1.00 (0.03-5.55) |
| 05        | Mining of coal, crude petroleum and natural gas                                                | 7.84           | 11             | 1.40 (0.71-3.28)  | 7.56           | 10             | 1.32 (0.63-2.43) | 0.70           | 1              | 1.42 (0.04-7.93) |
| 06        | Mining of metal ores                                                                           | 0.68           | 0              | 0.00 (0.00-0.00)  | 0.65           | 0              | 0.00 (0.00-0.00) | 0.07           | 0              | 0.00 (0.00-0.00) |
| 07        | Mining of non-metallic minerals, except fuel                                                   | 2.81           | 1              | 0.36 (0.12-1.86)  | 2.77           | 1              | 0.36 (0.01-2.01) | 0.21           | 0              | 0.00 (0.00-0.00) |
| 08        | Mining support service activities                                                              | 0.78           | 0              | 0.00 (0.00-0.00)  | 0.71           | 0              | 0.00 (0.00-0.00) | 0.10           | 0              | 0.00 (0.00-0.00) |
| 10        | Manufacture of food products                                                                   | 56.18          | 66             | 1.17 (0.91-1.55)  | 29.72          | 46             | 1.55 (1.13-2.06) | 21.78          | 20             | 0.92 (0.56-1.42) |
| 11        | Manufacture of beverages                                                                       | 2.34           | 2              | 0.85 (0.26-5.61)  | 1.94           | 2              | 1.03 (0.13-3.73) | 0.42           | 0              | 0.00 (0.00-0.00) |
| 12        | Manufacture of tobacco products                                                                | 0.17           | 0              | 0.00 (0.00-0.00)  | 0.14           | 0              | 0.00 (0.00-0.00) | 0.03           | 0              | 0.00 (0.00-0.00) |
| 13        | Manufacture of textiles, except apparel                                                        | 50.85          | 49             | 0.96 (0.73-1.29)  | 34.55          | 34             | 0.98 (0.68-1.38) | 14.60          | 15             | 1.03 (0.58-1.69) |
| 14        | Manufacture of wearing apparel, clothing accessories and fur articles                          | 13.60          | 6              | 0.44 (0.26-0.82)  | 6.73           | 2              | 0.30 (0.04-1.07) | 5.63           | 4              | 0.71 (0.19-1.82) |
| 15        | Manufacture of leather, luggage and footwear                                                   | 9.50           | 9              | 0.95 (0.51-2.02)  | 6.29           | 5              | 0.79 (0.26-1.85) | 2.83           | 4              | 1.41 (0.38-3.62) |
| 16        | Manufacture of wood and of products of wood and cork; except furniture                         | 14.72          | 11             | 0.75 (0.45-1.34)  | 12.88          | 8              | 0.62 (0.27-1.22) | 2.22           | 3              | 1.35 (0.28-3.95) |
| 17        | Manufacture of pulp, paper and paper products                                                  | 15.39          | 21             | 1.36 (0.83-2.42)  | 13.47          | 17             | 1.26 (0.74-2.02) | 2.32           | 4              | 1.72 (0.47-4.42) |
| 18        | Printing and reproduction of recorded media                                                    | 31.33          | 16             | 0.51 (0.36-0.75)  | 25.09          | 14             | 0.56 (0.31-0.94) | 6.46           | 2              | 0.31 (0.04-1.12) |
| 19        | Manufacture of coke, briquettes and refined petroleum products                                 | 3.56           | 5              | 1.40 (0.52-5.72)  | 3.66           | 5              | 1.36 (0.44-3.18) | 0.14           | 0              | 0.00 (0.00-0.00) |
| 20        | Manufacture of chemicals and chemical products; except pharmaceuticals and medicinal chemicals | 51.30          | 47             | 0.92 (0.70-1.23)  | 44.85          | 41             | 0.91 (0.66-1.24) | 7.78           | 6              | 0.77 (0.28-1.68) |
| 21        | Manufacture of pharmaceuticals, medicinal chemical and botanical products                      | 3.55           | 2              | 0.56 (0.21-2.30)  | 2.74           | 1              | 0.36 (0.01-2.03) | 0.80           | 1              | 1.25 (0.03-6.96) |
| 22        | Manufacture of rubber and plastics products                                                    | 19.96          | 15             | 0.75 (0.49-1.23)  | 16.07          | 13             | 0.81 (0.43-1.38) | 4.02           | 2              | 0.50 (0.06-1.80) |
| 23        | Manufacture of other non-metallic mineral products                                             | 23.34          | 21             | 0.90 (0.60-1.41)  | 21.27          | 17             | 0.80 (0.47-1.28) | 2.94           | 4              | 1.36 (0.37-3.49) |
| 24        | Manufacture of basic metals                                                                    | 53.14          | 61             | 1.15 (0.88-1.53)  | 51.33          | 56             | 1.09 (0.82-1.42) | 4.68           | 5              | 1.07 (0.35-2.50) |
| 25        | Manufacture of fabricated metal products, except machinery and furniture                       | 48.47          | 68             | 1.40 (1.06-1.90)  | 43.56          | 63             | 1.45 (1.11-1.85) | 6.59           | 5              | 0.76 (0.25-1.77) |
| 26        | Manufacture of electronic components, computer; visual, sounding and communication equipment   | 59.92          | 55             | 0.92 (0.71-1.20)  | 43.96          | 38             | 0.86 (0.61-1.19) | 15.51          | 17             | 1.10 (0.64-1.75) |

|    |                                                                                                          |        |     |                   |        |     |                  |       |    |                   |
|----|----------------------------------------------------------------------------------------------------------|--------|-----|-------------------|--------|-----|------------------|-------|----|-------------------|
| 27 | Manufacture of medical, precision and optical instruments, watches and clocks                            | 6.68   | 7   | 1.05 (0.42-2.16)  | 5.11   | 4   | 0.78 (0.21-2.00) | 1.56  | 3  | 1.92 (0.40-5.62)  |
| 28 | Manufacture of electrical equipment                                                                      | 28.99  | 21  | 0.72 (0.50-1.08)  | 24.69  | 17  | 0.69 (0.40-1.10) | 4.95  | 4  | 0.81 (0.22-2.07)  |
| 29 | Manufacture of other machinery and equipment                                                             | 65.06  | 67  | 1.03 (0.81-1.33)  | 59.62  | 55  | 0.92 (0.69-1.20) | 8.07  | 12 | 1.49 (0.77-2.60)  |
| 30 | Manufacture of motor vehicles, trailers and semitrailers                                                 | 93.05  | 109 | 1.17 (0.96-1.45)  | 81.27  | 91  | 1.12 (0.90-1.37) | 14.11 | 18 | 1.28 (0.76-2.02)  |
| 31 | Manufacture of other transport equipment                                                                 | 53.05  | 55  | 1.04 (0.79-1.38)  | 52.84  | 51  | 0.97 (0.72-1.27) | 3.64  | 4  | 1.10 (0.30-2.82)  |
| 32 | Manufacture of furniture                                                                                 | 10.09  | 12  | 1.19 (0.65-2.47)  | 8.38   | 12  | 1.43 (0.74-2.50) | 1.84  | 0  | 0.00 (0.00-0.00)  |
| 33 | Other manufacturing                                                                                      | 336.66 | 323 | 0.96 (0.86-1.07)  | 279.63 | 268 | 0.96 (0.85-1.08) | 61.40 | 55 | 0.90 (0.67-1.17)  |
| 35 | Electricity, gas, steam and air conditioning supply                                                      | 34.17  | 35  | 1.02 (0.73-1.48)  | 34.79  | 34  | 0.98 (0.68-1.37) | 1.78  | 1  | 0.56 (0.01-3.14)  |
| 36 | Water supply                                                                                             | 2.24   | 1   | 0.45 (0.13-3.12)  | 2.24   | 1   | 0.45 (0.01-2.48) | 0.14  | 0  | 0.00 (0.00-0.00)  |
| 37 | Sewage, wastewater, human and animal waste treatment services                                            | 2.13   | 2   | 0.94 (0.27-7.05)  | 1.70   | 1   | 0.59 (0.01-3.28) | 0.42  | 1  | 2.37 (0.06-13.20) |
| 38 | Waste collection, treatment and disposal activities; materials recovery                                  | 11.42  | 13  | 1.14 (0.64-2.25)  | 10.16  | 11  | 1.08 (0.54-1.94) | 1.59  | 2  | 1.26 (0.15-4.55)  |
| 41 | General construction                                                                                     | 192.92 | 194 | 1.01 (0.87-1.16)  | 186.95 | 182 | 0.97 (0.84-1.13) | 16.40 | 12 | 0.73 (0.38-1.28)  |
| 42 | Specialized construction activities                                                                      | 116.60 | 124 | 1.06 (0.89-1.29)  | 112.41 | 109 | 0.97 (0.80-1.17) | 10.47 | 15 | 1.43 (0.80-2.36)  |
| 45 | Sale of motor vehicles and parts                                                                         | 13.75  | 14  | 1.02 (0.60-1.87)  | 12.61  | 11  | 0.87 (0.44-.56)  | 1.69  | 3  | 1.78 (0.37-5.20)  |
| 46 | Wholesale trade on own account or on a fee or contract basis                                             | 180.47 | 171 | 0.95 (0.82-1.10)  | 141.27 | 134 | 0.95 (0.79-1.12) | 39.15 | 37 | 0.95 (0.67-1.30)  |
| 47 | Retail trade, except motor vehicles and motorcycles                                                      | 178.45 | 167 | 0.94 (0.81-1.09)  | 131.51 | 130 | 0.99 (0.83-1.17) | 44.75 | 37 | 0.83 (0.58-1.14)  |
| 49 | Land transport and transport via pipelines                                                               | 57.46  | 73  | 1.27 (0.98-1.68)  | 58.40  | 70  | 1.20 (0.93-1.51) | 3.08  | 3  | 0.97 (0.20-2.85)  |
| 50 | Water transport                                                                                          | 17.98  | 31  | 1.72 (1.09-2.91)  | 18.93  | 31  | 1.64 (1.11-2.32) | 0.53  | 0  | 0.00 (0.00-0.00)  |
| 51 | Air transport                                                                                            | 1.90   | 3   | 1.58 (0.42-14.14) | 1.86   | 3   | 1.62 (0.33-4.72) | 0.16  | 0  | 0.00 (0.00-0.00)  |
| 52 | Warehousing and support activities for transportation                                                    | 227.08 | 252 | 1.11 (0.97-1.27)  | 235.07 | 245 | 1.04 (0.92-1.18) | 9.29  | 7  | 0.75 (0.30-1.55)  |
| 55 | Accommodation                                                                                            | 21.20  | 23  | 1.08 (0.71-1.75)  | 11.13  | 17  | 1.53 (0.89-2.44) | 8.22  | 6  | 0.73 (0.27-1.59)  |
| 56 | Food and beverage service activities                                                                     | 81.17  | 56  | 0.69 (0.56-0.87)  | 24.03  | 14  | 0.58 (0.32-0.98) | 44.37 | 42 | 0.95 (0.68-1.28)  |
| 59 | Motion picture, video and television program production, sound recording and music publishing activities | 2.38   | 0   | 0.00 (0.00-0.00)  | 2.13   | 0   | 0.00 (0.00-0.00) | 0.33  | 0  | 0.00 (0.00-0.00)  |
| 60 | Broadcasting activities                                                                                  | 1.79   | 2   | 1.11 (0.29-11.02) | 1.11   | 2   | 1.80 (0.22-6.51) | 0.61  | 0  | 0.00 (0.00-0.00)  |
| 61 | Postal activities and telecommunications                                                                 | 23.73  | 22  | 0.93 (0.62-1.45)  | 22.93  | 22  | 0.96 (0.60-1.45) | 2.17  | 0  | 0.00 (0.00-0.00)  |
| 62 | Computer programming, consultancy and related activities                                                 | 12.94  | 14  | 1.08 (0.59-1.82)  | 11.65  | 14  | 1.20 (0.66-2.02) | 1.76  | 0  | 0.00 (0.00-0.00)  |
| 63 | Information service activities                                                                           | 19.70  | 12  | 0.61 (0.39-1.00)  | 17.34  | 12  | 0.69 (0.36-1.21) | 2.98  | 0  | 0.00 (0.00-0.00)  |
| 64 | Financial service activities, except insurance and pension funding                                       | 87.69  | 105 | 1.20 (0.98-1.45)  | 77.23  | 84  | 1.09 (0.87-1.35) | 13.39 | 21 | 1.57 (0.97-2.40)  |

|    |                                                                                            |        |     |                  |        |     |                  |        |     |                  |
|----|--------------------------------------------------------------------------------------------|--------|-----|------------------|--------|-----|------------------|--------|-----|------------------|
| 65 | Insurance and pension funding                                                              | 10.65  | 10  | 0.94 (0.52-1.91) | 9.44   | 8   | 0.85 (0.37-1.67) | 1.63   | 2   | 1.22 (0.15-4.42) |
| 66 | Activities auxiliary to financial service and insurance activities                         | 5.09   | 4   | 0.79 (0.21-2.01) | 4.13   | 4   | 0.97 (0.26-2.48) | 1.01   | 0   | 0.00 (0.00-0.00) |
| 68 | Real estate activities                                                                     | 277.96 | 272 | 0.98 (0.87-1.10) | 219.23 | 207 | 0.94 (0.82-1.08) | 57.06  | 65  | 1.14 (0.88-1.45) |
| 70 | Research and development                                                                   | 2.03   | 0   | 0.00 (0.00-0.00) | 1.79   | 0   | 0.00 (0.00-0.00) | 0.31   | 0   | 0.00 (0.00-0.00) |
| 71 | Professional services                                                                      | 51.16  | 46  | 0.90 (0.68-1.21) | 41.11  | 37  | 0.90 (0.63-1.24) | 10.59  | 9   | 0.85 (0.39-1.61) |
| 72 | Architectural, engineering and other scientific technical services                         | 47.42  | 46  | 0.97 (0.71-1.29) | 45.99  | 39  | 0.85 (0.60-1.16) | 4.12   | 7   | 1.70 (0.68-3.50) |
| 73 | Other professional, scientific and technical services                                      | 5.25   | 5   | 0.95 (0.42-2.84) | 4.18   | 4   | 0.96 (0.26-2.45) | 1.08   | 1   | 0.92 (0.02-5.14) |
| 74 | Business facilities management and landscape services                                      | 87.01  | 93  | 1.07 (0.87-1.33) | 51.70  | 64  | 1.24 (0.95-1.58) | 29.00  | 29  | 1.00 (0.67-1.44) |
| 75 | Business support services                                                                  | 193.35 | 198 | 1.02 (0.89-1.19) | 132.31 | 139 | 1.05 (0.88-1.24) | 54.17  | 59  | 1.09 (0.83-1.40) |
| 76 | Rental and leasing activities; except real estate                                          | 8.00   | 9   | 1.12 (0.57-2.60) | 7.24   | 9   | 1.24 (0.57-2.36) | 1.05   | 0   | 0.00 (0.00-0.00) |
| 84 | Public administration and defence; compulsory social security                              | 33.74  | 27  | 0.80 (0.57-1.16) | 26.84  | 20  | 0.75 (0.46-1.15) | 7.04   | 7   | 0.99 (0.40-2.05) |
| 85 | Education                                                                                  | 103.25 | 86  | 0.83 (0.69-1.02) | 34.14  | 29  | 0.85 (0.57-1.22) | 56.43  | 57  | 1.01 (0.77-1.31) |
| 86 | Human health activities                                                                    | 117.69 | 105 | 0.89 (0.74-1.08) | 58.58  | 55  | 0.94 (0.71-1.22) | 49.08  | 50  | 1.02 (0.76-1.34) |
| 87 | Social work activities                                                                     | 84.63  | 74  | 0.87 (0.71-1.10) | 24.29  | 15  | 0.62 (0.35-1.02) | 47.29  | 59  | 1.25 (0.95-1.61) |
| 90 | Creative, arts and recreation related services                                             | 3.41   | 4   | 1.17 (0.43-4.97) | 2.37   | 2   | 0.84 (0.10-3.05) | 0.94   | 2   | 2.12 (0.26-7.65) |
| 91 | Sports activities and amusement activities                                                 | 55.46  | 78  | 1.41 (1.08-1.86) | 39.77  | 58  | 1.46 (1.11-1.89) | 14.17  | 20  | 1.41 (0.86-2.18) |
| 94 | Membership organizations                                                                   | 100.78 | 104 | 1.03 (0.85-1.27) | 72.99  | 72  | 0.99 (0.77-1.24) | 25.46  | 32  | 1.26 (0.86-1.77) |
| 95 | Maintenance and repair services of personal and household goods                            | 19.83  | 31  | 1.56 (1.06-2.22) | 18.73  | 26  | 1.39 (0.91-2.03) | 2.05   | 5   | 2.44 (0.79-5.69) |
| 96 | Other personal services activities                                                         | 85.63  | 82  | 0.96 (0.76-1.19) | 58.10  | 63  | 1.08 (0.83-1.39) | 24.52  | 19  | 0.77 (0.47-1.21) |
| 98 | Undifferentiated goods-and services-producing activities of private households for own use | 32.21  | 40  | 1.24 (0.89-1.69) | 26.38  | 33  | 1.25 (0.86-1.76) | 6.01   | 7   | 1.16 (0.47-2.40) |
| 99 | Activities of extraterritorial organizations and bodies                                    | 9.63   | 14  | 1.45 (0.79-2.44) | 1.61   | 2   | 1.47 (0.76-2.56) | 8.18   | 12  | 1.25 (0.15-4.50) |
|    | Non-confirmed                                                                              | 626.88 | 605 | 0.97 (0.89-1.05) | 507.63 | 496 | 0.98 (0.89-1.07) | 125.84 | 109 | 0.87 (0.71-1.04) |
